1 **TITLE:**

2 **A DUF1068 protein acts as a pectin biosynthesis scaffold and maintains Golgi morphology**  
3 **and cell adhesion in Arabidopsis.**

4  
5 **AUTHORS & AFFILIATIONS:**

6 Rahul S. Lathe<sup>1,2\*</sup>, Heather E. McFarlane<sup>3,4\*,#</sup>, Ghazanfar Abbas Khan<sup>4,5</sup>, Berit Ebert<sup>4</sup>, Eduardo  
7 Antonio Ramírez-Rodríguez<sup>3</sup>, Niels Noord<sup>2</sup>, Rishikesh Bhalerao<sup>2</sup>, Staffan Persson<sup>1,6,7,8,#</sup>

8  
9 <sup>1</sup> Max-Planck Institute for Molecular Plant Physiology, Am Muehlenberg 1, 14476 Potsdam,  
10 Germany

11 <sup>2</sup> Umeå Plant Science Centre (UPSC), Department of Forest Genetics and Plant Physiology,  
12 Swedish University of Agricultural Sciences (SLU), SE-90187, Umeå, Sweden

13 <sup>3</sup> Department of Cell & Systems Biology, University of Toronto, Toronto, ON, Canada, M5S3G5

14 <sup>4</sup> School of Biosciences, University of Melbourne, Parkville, Australia, 3010

15 <sup>5</sup> Department of Animal, Plant and Soil Sciences, School of Life Sciences, La Trobe University,  
16 Bundoora, VIC 3086, Australia

17 <sup>6</sup> Department of Plant & Environmental Sciences, University of Copenhagen, 1871,  
18 Frederiksberg C, Denmark

19 <sup>7</sup> Copenhagen Plant Science Center, University of Copenhagen, 1871, Frederiksberg C,  
20 Denmark

21 <sup>8</sup> Joint International Research Laboratory of Metabolic & Developmental Sciences, State Key  
22 Laboratory of Hybrid Rice, SJTU-University of Adelaide Joint Centre for Agriculture and  
23 Health, School of Life Sciences and Biotechnology, Shanghai Jiao Tong University,  
24 Shanghai, China

25  
26 \* Authors contributed equally to this work

27  
28 #Corresponding authors:

29 Staffan Persson

30 Department of Plant & Environmental Sciences,

31 University of Copenhagen,

32 1871, Frederiksberg C, Denmark

33 Email: [staffan.persson@plen.ku.dk](mailto:staffan.persson@plen.ku.dk)

34  
35 Heather E. McFarlane

36 Department of Cell & Systems Biology

37 University of Toronto

38 25 Harbord St

39 Toronto, ON, M5S 3G5, Canada

40 Email: [h.mcfarlane@utoronto.ca](mailto:h.mcfarlane@utoronto.ca)

41

42 **ABSTRACT:**

43 Adjacent plant cells are connected by specialized cell wall regions, called middle lamellae,  
44 which influence critical agricultural characteristics, including fruit ripening and organ  
45 abscission. Middle lamellae are enriched in pectin polysaccharides, specifically  
46 homogalacturonan (HG). Here, we identify a plant-specific Arabidopsis DUF1068 protein,  
47 called NKS1, that is required for middle lamellae integrity and cell adhesion. NKS1 localises to  
48 the Golgi apparatus and loss of the protein results in changes to Golgi structure and function.  
49 The *nks1* mutants also display HG deficient phenotypes, including reduced seedling growth,  
50 changes to cell wall composition, and tissue integrity defects. These phenotypes are identical  
51 to those of the HG deficient mutants *qua1* and *qua2*. Notably, NKS1 physically interacts with  
52 both QUA1 and QUA2, and genetic interaction analyses reveal that they work in the same  
53 pathway. Based on these results we propose that NKS1 works as a scaffold for HG synthesis  
54 and that such scaffolding is important to support Golgi function and the organization of the  
55 pectin synthesis machinery.

56

57

58 **INTRODUCTION:**

59 Growing plant cells are surrounded by a primary cell wall: a strong yet flexible  
60 extracellular matrix that is largely made of polysaccharides. Cell walls have the strength to  
61 resist turgor pressure and to direct cell morphology, but they are flexible enough to allow  
62 plant cells to expand. Long, strong cellulose microfibrils are the main load-bearing  
63 components of primary cell walls and are embedded in a hydrated matrix of pectins and  
64 hemicelluloses, with some proteins (Anderson & Kieber, 2020). Pectins are a heterogeneous  
65 class of acidic polysaccharides that are divided into Homogalacturonan (HG),  
66 Rhamnogalacturonan (RG) I and RGII (Atmodjo et al., 2013; Anderson, 2016). Pectins are  
67 particularly abundant in the primary cell walls of dicots, such as the model plant, *Arabidopsis*  
68 *thaliana*.

69 Pectins are made in the Golgi apparatus by the coordinated action of transporters and  
70 enzymes. Sugar interconversion enzymes, which are generally cytosolic, generate the  
71 nucleotide sugar building blocks for pectin synthesis (Temple et al., 2016); nucleotide sugar  
72 transporters facilitate their movement across Golgi membranes (Rautengarten et al., 2014);  
73 glycosyltransferases (GTs) catalyze their incorporation into pectic polysaccharides (Bouton et  
74 al., 2002); and methyltransferases and acetyltransferases further modify some pectins  
75 (Mouille et al., 2007). In particular, HG is secreted in a highly methylesterified form (Zhang &  
76 Staehelin, 1992). Once in the cell wall, HG may be modified by de-esterification, which can  
77 affect pectin crosslinking via Ca<sup>2+</sup>, and ultimately influence the mechanical properties of the  
78 cell wall (Peaucelle et al., 2011; Peaucelle et al., 2015). Indeed, a feedback loop exists between  
79 mechanical forces and pectin synthesis (Verger et al., 2018), and pectins are implicated in  
80 plant cell morphogenesis (Peaucelle et al., 2015; Bidhendi et al., 2019; Haas et al., 2020). For  
81 example, during growth symmetry breaking in the Arabidopsis hypocotyl, changes to pectin  
82 structure precede other changes in the cell cortex and cell wall, including cortical microtubule  
83 reorientation and realignment of cellulose deposition (Peaucelle et al., 2015).

84 Adjacent plant cells are connected by specialized regions of the cell wall, called middle  
85 lamellae. Regulation and degradation of middle lamellae underly critical agricultural  
86 characteristics, including fruit ripening (Uluisk et al., 2016) and organ abscission (Rhee et al.,  
87 2003; Ogawa et al., 2009), such as seed pod shattering (Lewis et al., 2006). Middle lamellae  
88 are pectin-rich and particularly enriched in HG (Willats et al., 2001). Therefore, defects in HG

89 synthesis can lead to loss of cell-cell adhesion and epidermal tissue integrity, with dramatic  
90 consequences for plant growth and development (Bouton et al., 2002; Mouille et al., 2007).  
91 Such defects are evident in mutants that affect a member of the GT8 family of putative  
92 galacturonosyl transferases (GalATs) called QUASIMODO (QUA)1; *qua1* mutants had reduced  
93 levels of HG and displayed epidermal cell separation (Bouton et al., 2002). Similar phenotypes  
94 are observed in plants with mutations that affected a potential pectin methyltransferase,  
95 QUA2 (Mouille et al., 2007). While the pectin methyltransferase activity of QUA2 has not yet  
96 been demonstrated, a close homolog of QUA2, QUA3, was subsequently shown to harbor  
97 such activity (Miao et al., 2011).

98 While pectin synthesis occurs in the Golgi apparatus, there is contradictory data as to  
99 whether proteins required for HG synthesis are distributed across different Golgi cisterna  
100 (Zhang & Staehelin, 1992; Parsons et al., 2019), or whether HG synthesis proteins act as part  
101 of multiprotein complexes (Atmodjo et al., 2011; Harholt et al., 2012; Atmodjo et al., 2013),  
102 or a combination of both models (Zabotina et al., 2021; Hoffmann et al., 2021). A better  
103 understanding of the pectin synthesis machinery and its interactors is required to appreciate  
104 the synthesis of this class of polysaccharides and to open potential for pectin engineering for  
105 agricultural improvements. Here, we report that a plant-specific Golgi-localized protein of  
106 unknown function (DUF1068) interacts with QUA1 and QUA2 to support HG synthesis, Golgi  
107 integrity and cell adhesion. We propose that this DUF1068 protein is a scaffold for HG  
108 synthesis and that such scaffolding is important to support Golgi function and the  
109 organization of the pectin synthesis machinery.

110

111

## 112 **RESULTS:**

### 113 **A DUF1068 protein, referred to as NKS1, is required for cell elongation.**

114 Co-expression is a powerful approach to identify functionally related genes (Usadel et  
115 al., 2009). Using ATTED-II (Obayashi et al. 2018), we identified several genes from the  
116 Arabidopsis DUF1068 family as co-expressed with primary wall *CELLULOSE SYNTHASE (CESA)*  
117 genes and pectin biosynthesis-related genes, including *GALACTURONOSYL TRANSFERASES*  
118 (GalATs) *9 (GAUT9)* and *QUA1*, the HG methyltransferase *QUA3*, and many S-  
119 adenosylmethionine family transporter genes, which might play important roles in HG-  
120 methyltransferase activity (Table S1 and S2). We tested T-DNA lines that were annotated to  
121 target DUF1068 genes from the co-expression list above. Of the ones we tested, two  
122 independent T-DNA lines targeting the DUF1068 gene *At4g30996* (also called *Na<sup>+</sup> AND K<sup>+</sup>-*  
123 *SENSITIVE 1 (NKS1)*; Choi et al., 2011) displayed significant reduction in mean hypocotyl length  
124 of six-day-old etiolated seedlings, compared to wild type (Figures 1B, 1C). Moreover, growth  
125 kinematics of etiolated seedlings were dramatically affected in the *nks1* mutant hypocotyls  
126 compared to wild type (Figure 1D). We refer to these two T-DNA lines as *nks1-1* (SALK\_15107)  
127 and *nks1-2* (GK-228H05) (Figure S1A). Whereas RT-PCR analysis indicated that the two lines  
128 were transcriptional null lines (Figure S1B), qPCR analyses revealed some residual *NKS1*  
129 expression in *nks1-1* (Figure 1A). Nevertheless, there was a substantial reduction in *NKS1*  
130 expression in the two T-DNA lines and the growth phenotypes of *nks1-1* and *nks1-2* seedlings  
131 could be rescued by molecular complementation using fluorescent protein fusions to NKS1,  
132 either NKS1-GFP or GFP-NKS1 (Figure 1E). Although NKS1 is ubiquitously expressed, we  
133 primarily observed phenotypes in young seedlings (Figure S1C).

134

### 135 **Functional fluorescently-tagged NKS1 fusions localize to the medial-Golgi apparatus.**

136 To better understand NKS1 function, we undertook subcellular localization studies of  
137 the functional NKS1-GFP and GFP-NKS1 lines (Figure 1E). Both NKS1-GFP and GFP-NKS1 were  
138 localized to doughnut shaped particles that were rapidly streaming in the cytoplasm of  
139 hypocotyl epidermal cells (Figure 2A), which is typical of Golgi-or trans-Golgi Network (TGN)  
140 localized proteins. We also generated a NKS1-mRFP fusion for colocalization purposes that  
141 displayed similar localization to both GFP fusions. Quantitative colocalization with markers  
142 for the ER (HDEL; Batoko et al., 2000), the Golgi apparatus (WAVE18/Got1P homolog and  
143 WAVE22/SYP32, Geldner et al., 2009), the *trans*-Golgi Network (TGN; VHAA1, Dettmer et al.,  
144 2006), and late endosomes (WAVE2/RabF2b and WAVE7/RabF2a, Geldner et al., 2009)  
145 revealed that NKS1-GFP co-localized with Golgi markers and displayed some overlap with TGN  
146 markers (Figure 2B; Figure S2A). To distinguish between the Golgi and TGN, we treated  
147 seedlings with Brefeldin A (BFA) for 60 minutes, which in Arabidopsis root cells causes  
148 aggregation of TGN and other compartments into BFA bodies, while intact Golgi stacks  
149 surround the core of the BFA body (Geldner et al., 2003; Grebe et al., 2003; Gendre et al.,  
150 2011). After BFA treatment, NKS1-GFP localized to discrete puncta around the core of the BFA  
151 body, and NKS1-GFP remained highly colocalized with the Golgi marker, XYLT (Saint-Jore-  
152 Dupas et al., 2006) but was no longer colocalized with the TGN marker, VHAA1, which was in  
153 the core of the BFA bodies (Dettmer et al., 2006) (Figure S2B). These data are consistent with  
154 those of subcellular proteomics studies, which have detected NKS1 in Golgi fractions  
155 (Nikolovski et al., 2012; Parsons et al., 2012; Parsons et al., 2019).

156 Different Golgi cisternae are associated with different biochemical functions, *i.e.*, the  
157 assembly or modification of certain cell wall components (Zabotina et al., 2021; Hoffmann et  
158 al., 2021). To investigate whether NKS1 is associated with certain cisternae, we next crossed  
159 the NKS1-GFP or NKS1-RFP fluorescent lines with markers for the *cis*-Golgi (NAG, Grebe et al.,  
160 2003), *medial*-Golgi (XYLT, Saint-Jore-Dupas et al., 2006) or *trans*-Golgi (ST, Renna et al., 2005)  
161 to generate dual-labelled fluorescent lines. While NKS1 co-localized with all three markers,  
162 the highest degree of colocalization was observed with *medial*-Golgi markers (Figure 2C-2F).  
163 Together, these results confirm that the functional NKS1-GFP fusion is preferentially localized  
164 to medial-cisternae of the Golgi apparatus.

165

166 **NKS1 is a plant-specific transmembrane protein with its DUF1068 domain inside the Golgi**  
167 **lumen.**

168 NKS1 encodes a plant-specific protein of 172 amino acids with a predicted molecular  
169 mass of 19 kDa. Genes encoding DUF1068-containing proteins are found throughout land  
170 plants (Embryophyta), including *Marchantia polymorpha* and *Physcomitrium patens*,  
171 suggesting that DUF1068 function was acquired as plants colonized land (Figure S3A). NKS1 is  
172 predicted to contain one transmembrane domain (TM; TmHMM server, Krohg et al., 2001)  
173 (Figure S3B). This prediction also suggested that the first 17 amino acids in the N-terminus of  
174 NKS1 are cytoplasmic, which would imply that the amino acids after the TM domain would  
175 face the Golgi lumen. To test this prediction, we used a GO-PROMPTO assay (Søgaard et al.,  
176 2012). Here, we fused the N-terminal part of VENUS (Vn; the first 155 amino acids), or the C-  
177 terminal part of VENUS (Vc; the last 84 amino acids), in frame either before (cytosolic  
178 reporter) or after (Golgi luminal reporter) the first 52 amino acids of the rat ST protein (TMD),  
179 which consists of a transmembrane domain targeted to the Golgi apparatus. We observed  
180 clear fluorescence complementation only when co-expressing Vc-NKS1 with the cytosolic  
181 reporter, but not with the luminal reporter (Figure S3C). These results corroborate that the

182 N-terminus of NKS1 faces the cytoplasm, while the bulk of the protein, including the DUF1068  
183 domain, is in the Golgi lumen (Figure S3D).

184

### 185 ***nks1* mutants are defective in Golgi structure and function.**

186 The Golgi localization of NKS1 prompted us to examine the structure and function of  
187 the Golgi apparatus in *nks1* mutants. We therefore generated double Golgi marker lines that  
188 carried the *cis*-Golgi marker NAG-EGFP (Grebe et al., 2003) and the *trans*-Golgi marker ST-  
189 mRFP (Renna et al., 2005). Simultaneous dual colour live cell imaging and object-based  
190 colocalization between the two markers demonstrated that these two Golgi markers were  
191 significantly further apart in *nks1-2* mutants, relative to wild type (Figure 3A-3C). This  
192 increased separation between *cis*-Golgi and *trans*-Golgi in *nks1* mutants was not an artefact  
193 of faster Golgi stack movement within cells; in fact, measurements of Golgi marker dynamics  
194 indicated that Golgi stacks moved significantly slower in *nks1-2* mutants, relative to wild type  
195 (Figure 3D). We therefore examined Golgi structure at high resolution using transmission  
196 electron microscopy (TEM) of high-pressure frozen, freeze-substituted hypocotyls and found  
197 that Golgi morphology was dramatically affected in *nks1* mutants (Figure 3E). We frequently  
198 observed curved Golgi stacks in both alleles of *nks1*, and the proportion of curved Golgi stacks  
199 was significantly higher in *nks1* mutants than wild type (Figure 3F). Loss of NKS1 also resulted  
200 in fewer cisternae per Golgi stack but no changes to other Golgi morphometrics (cisternal  
201 length:width, proportion of Golgi stacks with an associated TGN) (Table S5). Dual-axis  
202 transmission electron tomograms of wild type and *nks1-2* Golgi stacks confirmed that Golgi  
203 curving was not an artefact of the plane of section and provided additional insight into the  
204 Golgi structure defects observed in *nks1* mutants (Figure 3G).

205 To determine whether the structural changes to the Golgi apparatus affected Golgi  
206 function in *nks1* mutants, we assayed a ratiometric marker of soluble protein secretion, sec-  
207 GFP (Samalova et al., 2006). Sec-GFP is GFP fused to a signal peptide, which directs the protein  
208 to the secretory pathway and ultimately to the apoplast, where the GFP fluorescence is  
209 quenched by the low pH; because of the stochastic expression of sec-GFP, especially in  
210 epidermal cells, an endomembrane-targeted RFP is produced in equal amounts to sec-GFP;  
211 therefore, the ratio of GFP:RFP can be compared across different plants (Samalova et al.,  
212 2006). The ratio of GFP:RFP was significantly higher in *nks1-2* mutants compared to wild type  
213 (Figure 3H; Figure S4A), indicating a secretion defect.

214 Since secretion flows through both the Golgi apparatus and the TGN, we tested  
215 whether TGN structure or function was affected in *nks1* mutants. Using simultaneous dual  
216 colour live cell imaging and object-based colocalization, we found no significant difference in  
217 the distance between a Golgi marker (WAVE18, Geldner et al., 2009) and TGN marker (VHAa1,  
218 Dettmer et al., 2006) between wild type and *nks1* (Figure 3C; Figure S4B). There were also no  
219 substantial differences in Golgi-TGN association or TGN morphology at the TEM level (Figure  
220 S4C). To examine anterograde trafficking from the TGN, we tracked the localization of PIN2-  
221 GFP (Xu & Scheres, 2005) in response to BFA. Since BFA-treatment of Arabidopsis root  
222 epidermal cells induces aggregation of TGN and endosomes in the BFA body, but leaves Golgi  
223 stacks intact and clustered around the BFA body (Geldner et al., 2003; Grebe et al., 2003;  
224 Gendre et al., 2011), signal recovery after BFA washout primarily involves protein secretion  
225 from the BFA body/TGN to the plasma membrane. We found no significant differences  
226 between the ratio of PIN2-GFP plasma membrane signal compared to intracellular signal or  
227 in the number of BFA bodies between wild type and *nks1-2* mutants at any stage of BFA  
228 treatment or washout (Figure S4D). Finally, since the plant TGN also functions as an early

229 endosome (Viotti et al., 2010), we assayed endocytosis by tracking uptake of the fluorescent  
230 endocytic marker, FM4-64 (Bolte et al., 2004). There were no significant differences in FM4-  
231 64 uptake between wild type and *nks1-2* (Figure S4E). Together, these results indicate that  
232 while TGN structure and function seem unaffected by loss of NKS1, Golgi apparatus structure  
233 and function are impaired in *nks1* mutants.

234

### 235 ***nks1* mutants are defective in cell adhesion and cell wall pectins.**

236 In addition to the defects in cell elongation, *nks1-1* and *nks1-2* mutants displayed  
237 defects in cell adhesion: in cryo-scanning electron microscopy (cryo-SEM), hypocotyl cells of  
238 *nks1* mutants seemed to be peeling apart in both epidermal and cortical cell layers (Figure 4A  
239 & 4B). Consistent with a loss of tissue integrity, *nks1* mutant hypocotyls were permeable to  
240 toluidine blue dye (Figure S5A).

241 The cell walls of adjacent plant cells are joined by the middle lamella, a pectin-rich  
242 region that is particularly enriched in HG (Willats et al., 2001) and changes in cell wall HG can  
243 therefore lead to cell-cell adhesion defects and loss of epidermal tissue integrity (Bouton et  
244 al., 2002; Mouille et al., 2007). HG and other pectins are characterized by high levels of  
245 galacturonic acid (GalA) (Atmodjo et al., 2013). Therefore, we quantified total cell wall  
246 monosaccharides by HPAEC-PAD. These experiments revealed a significant reduction in GalA  
247 content compared to wild type in *nks1-2*, which was accompanied by a significant increase in  
248 arabinose content compared to wild type (Figure 4C; Table S3). Sequential extraction of cell  
249 wall polymers confirmed that a significant decrease in GalA in both *nks1* alleles was associated  
250 with the CDTA-extracted fraction that mainly extracts calcium cross-linked pectins from the  
251 cell wall. *nks1* mutants also displayed other pectin defective phenotypes, including reduced  
252 seed coat mucilage (Western et al., 2000) (Figure 4D). Despite *NKS1* coexpression with  
253 primary wall *CESA* genes (Table S1), we did not observe any significant differences in cellulose  
254 content between *nks1-2* and wild type seedlings (Figure S5B). Similarly, there were no  
255 significant changes in fluorescently-tagged *CESA* dynamics in the plasma membrane (Paredes  
256 et al., 2006) in *nks1-2* mutant hypocotyl cells, compared to wild type (Figure S5C).

257

### 258 ***nks1* mutants phenocopy *qua1* and *qua2* pectin synthesis mutants and NKS1 interacts with 259 QUA1 and QUA2.**

260 The cell wall pectin and cell adhesion defects of *nks1* mutants were reminiscent of  
261 *qua1* (Bouton et al., 2002) and *qua2* mutants (Mouille et al., 2007), and *NKS1* was tightly co-  
262 expressed with *QUA1* and *QUA3* (Table S1). *QUA1* is similar to GT8 family GalATs and *QUA2*  
263 is putative methyltransferase; both have been implicated in HG synthesis (Bouton et al., 2002;  
264 Mouille et al., 2007). We therefore investigated whether *nks1* mutants shared other  
265 physiological, molecular, and genetic phenotypes with *qua1* and *qua2* mutants.

266 Cell adhesion mutants, including *qua1* and *qua2*, display increased pectin related cell  
267 wall integrity signaling (Verger et al., 2016), such as increased expression of *FAD-LINKED*  
268 *OXIDOREDUCTASE* (*FADLox*), a marker gene associated with pectin responses (Denoux et al.,  
269 2008; Kohorn et al., 2014). Similar to that of the *qua* mutants, *nks1-1* and *nks1-2* showed  
270 significant increase in *FADLox* expression compared to wild type (Figure S6A). The *nks1*  
271 mutants also displayed increased accumulation of anthocyanins when grown on high sucrose  
272 containing growth media (Figure S6B), which was observed in the *qua1-1* and *qua2-1* mutants  
273 (Verger et al., 2016, Bouton et al., 2002, Gao et al., 2008; Krupkova et al., 2007).

274 Recently, Verger et al., 2018 documented the importance of epidermal continuity for  
275 mechano-perception. By modulating turgor (by changing the osmotic potential of the growth

276 media) they could rescue cell-adhesion defects in *qua1* and *qua2* mutants, possibly through  
277 a tension-adhesion mechanism connected to cortical microtubules (Verger et al., 2018). To  
278 test whether we also could restore the cell adhesion defects in *nks1* mutants, we grew  
279 seedlings on media with reduced osmotic potential, *i.e.*, on “hard” media (2.5% agar; Verger  
280 et al., 2018) compared to control (0.8% agar). Interestingly, cell elongation and cell adhesion  
281 defects were significantly restored when *nks1* seedlings were grown on the hard media  
282 (Figure S6C).

283 Mutations in *ESMD1*, which encodes a putative O-fucosyltransferase GT106 family  
284 protein, suppress the *qua1-1* and *qua2-1* growth and cell adhesion phenotypes. Introducing  
285 *esmd1-1* into *nks1-2* also suppressed the hypocotyl elongation and cell adhesion phenotypes  
286 of *nks1-2* (Figure 5A & 5B), implying that loss of *NKS1*, *QUA1*, and *QUA2* all affect the same  
287 cell wall sensing and/or response pathway. To directly test this hypothesis, we generated  
288 double mutants between *nks1-2* and *qua2-1*. Because the *qua1-1* is in the Ws-4 background,  
289 we focused our efforts on the *qua2-1* which, like the *nks1* alleles, is in a Col-0 background. We  
290 found that *nks1-2 qua2-1* double mutants resembled the single mutants, which is consistent  
291 with the hypothesis that *NKS1* and *QUA2* act in the same complex or pathway (Figure 5C &  
292 5D).

293 As the bulk of the *NKS1* resides inside the Golgi lumen (Figure S3D), but the DUF1068  
294 sequence does not harbour any hallmarks of enzymatic activity, we wondered whether *NKS1*  
295 might physically interact with *QUA1* and *QUA2*, potentially acting as a pectin synthesis  
296 scaffold. To test this hypothesis, we performed immunoprecipitation of *NKS1*-GFP followed  
297 by LC-MS/MS analysis. We identified 248 proteins that were present with ‘high’ confidence in  
298 all three experiments and in at least six out of the eight biological replicates. To further refine  
299 this list, we used SUBA (Hooper et al., 2017) to filter for proteins that are predicted to localize  
300 to the Golgi apparatus, resulting in 94 candidates (Figure 5E). Comparison of these results  
301 with previously published Golgi proteomes (Nikolovski et al., 2012; Parsons et al., 2012;  
302 Parsons et al., 2019) revealed that 40% of the proteins identified via *NKS1*-GFP  
303 immunoprecipitation were a subset of these Golgi proteomes (Figure 5E; Table S4).  
304 Importantly, *QUA1* *QUA2* were identified among the top putative *NKS1* interactors in all three  
305 experiments and all eight biological replicates of *NKS1*-GFP immunoprecipitation (Table S4).  
306 To corroborate that *NKS1* interacts with *QUA1* and *QUA2*, we undertook Bimolecular  
307 Fluorescence Complementation (BiFC) assays using Arabidopsis root protoplasts. Here, we  
308 detected clear positive interactions between *NKS1* and *QUA1*, which localized to small  
309 intracellular puncta, but we did not observe any signs of interaction between *NKS1* and  
310 another Golgi localized protein, *Got1p* (Figure 5F).

311 Taken together, the similar physiological, molecular, and genetic phenotypes imply  
312 that *NKS1*, *QUA1*, and *QUA2* act in the same pathway, which we confirmed by documenting  
313 their physical interaction in the Golgi apparatus.

314

315

## 316 **DISCUSSION:**

317 Domain of Unknown Function proteins are classified by sequence similarity to each  
318 other but not to any protein of known function and make up almost 22% of all proteins in the  
319 Pfam database (El Gebali et al., 2019). *NKS1* belongs to the DUF1068 family, members of  
320 which are only found in land plants (Embryophyta), and almost all annotated DUF1068  
321 proteins consist entirely of only the DUF1068 domain, making it difficult to deduce their  
322 function from protein sequence. Previous studies had implicated *NKS1* in salt tolerance (Choi

323 et al., 2011); we hypothesize that the high concentration of sucrose in the media used by Choi  
324 et al. (2011) exacerbated the cell wall phenotype, since there are complex relationships  
325 between sugar availability and cell wall integrity responses (Hamann et al., 2009; Englesdorf  
326 et al., 2018). Here we show that NKS1 maintains Golgi apparatus structure and function, and  
327 may act as a scaffold for pectin synthesizing proteins.

328 Changes in pectin synthesis have been correlated with changes to Golgi structure  
329 (Young et al., 2008; Wang et al., 2017). For example, in seed coat epidermal cells, which  
330 synthesize an extraordinary volume of pectic mucilage during their development, Golgi stacks  
331 showed swollen margins, many associated vesicles, and a complex *trans*-Golgi network, while  
332 these changes were not observed in mutants lacking a key pectin synthesis gene (Young et  
333 al., 2008). Whether these structural changes to the Golgi reflect an active remodeling of the  
334 endomembrane system or are a passive consequence of polysaccharide flux through the Golgi  
335 remains to be determined (Hoffmann et al., 2021). Notably, in mammalian (HeLa) cells,  
336 changes to Golgi protein interactions were correlated with loss of GT function and dramatic  
337 changes to Golgi structure (van Galen et al., 2014), implying an important relationship  
338 between Golgi structure and function. These data are consistent with our characterization of  
339 *nks1* mutants, in which Golgi structure and function were defective. While the relationship  
340 between Golgi structure and function remains elusive, modelling has demonstrated that both  
341 changes to Golgi lipid composition and changes to curvature-generating proteins (*i.e.*, vesicle  
342 trafficking machinery) can influence Golgi shape (Campelo et al 2017). According to this  
343 model, changes to pectin synthesis in *nks1* Golgi stacks might passively reshape the Golgi  
344 apparatus due to changes in vesicle trafficking.

345 The phenotypes of *nks1* mutants are strikingly similar to *qua1* and *qua2* mutants,  
346 including reduced cell elongation, cell adhesion defects, and suppression of the phenotypes  
347 under hyperosmotic conditions or by loss of ESMD (Verger et al., 2016). QUA1 is a predicted  
348 GalAT implicated in HG synthesis (Bouton et al., 2002), while QUA2 is a putative HG  
349 methyltransferase (Mouille et al., 2007). NKS1 lacks any sequence features that might suggest  
350 it is directly involved in pectin synthesis. However, the interactions between NKS1 and QUA1  
351 and QUA2 led us to hypothesize that NKS1 could play a role in organizing the pectin synthesis  
352 machinery in the Golgi apparatus by mediating close associations between QUA1 and QUA2.  
353 Previous studies of HG synthesis have documented interactions between GAUT1 and GAUT7  
354 (Atmodjo et al., 2011). While enzymatic activity has only been documented for GAUT1  
355 (Sterling et al., 2006), GAUT7 is required for proper GAUT1 localisation to the Golgi (Atmodjo  
356 et al., 2011), and GAUT7 can increase GAUT1 activity *in vitro* (Amos et al., 2018). HG is  
357 secreted in a highly methylesterified form, presumably to prevent it from forming calcium  
358 bridge-mediated aggregations before its incorporation into the cell wall. Quantitative  
359 immunolabelling of HG in pectin synthesizing Golgi stacks predicted that HG  
360 methylesterification is highly efficient and nearly simultaneous with HG backbone synthesis,  
361 suggesting that the enzymes for backbone formation and methylesterification must act in  
362 concert (Zhang & Staehelin, 1992). Therefore, we propose a model in which NKS1 mediates  
363 interactions between the putative GalAT, QUA1, and the putative HG methyltransferase,  
364 QUA2, thus acting as a scaffold for these proteins to facilitate efficient and coordinated HG  
365 synthesis and methylesterification before pectin secretion.

366  
367

368 **ACKNOWLEDGEMENTS:**



369 Some live cell imaging was conducted using instruments that are part of the Biological Optical  
370 Microscopy Platform (BOMP) at University of Melbourne and electron microscopy was  
371 conducted using instruments that are part of the Melbourne Advanced Microscopy Facility.  
372 We thank Shuai Nie and Ching-Seng Ang for processing samples at the Melbourne Mass  
373 Spectrometry and Proteomics Facility of The Bio21 Molecular Science and Biotechnology  
374 Institute. R.S.L acknowledges PhD scholarship from Deutscher Akademischer Austausch  
375 Dienst (DAAD., PKZ:91540412 (formerly A/10/75281)) at MPIMP; Germany and postdoctoral  
376 grant from Kempe foundation (# SMK-1759) to RPB at UPSC, Sweden. H.E.M. acknowledges  
377 an ARC Discovery Early Career Researcher Award (DE170100054), NSERC Discovery Grant  
378 (2020-05959) and funding from the Canada Research Chairs program as Canada Research  
379 Chair in Plant Cell Biology. B.E. acknowledges ARC Future Fellowship and Discovery Project  
380 Awards (FT160100276, DP180102630) and ongoing support from the University of Melbourne  
381 Botany Foundation. E.A.R.R. is supported by a CONACyT Beca de Posgrado en el Extranjero  
382 (2020-000000-01EXTF-00193). G.A.K. acknowledges an ARC Discovery Early Career  
383 Researcher Award (DE210101200) and a Swiss National Science Foundation Grant  
384 (P400PB\_180834/1). N.N acknowledges funding from Erasmus+ (NL GRONING03). S.P.  
385 acknowledges the financial aid of an ARC Discovery grant (DP19001941), Villum Investigator  
386 (Project ID: 25915), DNRF Chair (DNRF155) and Novo Nordisk Laureate (NNF19OC0056076)  
387 grants.  
388  
389  
390  
391

## 392 **METHODS:**

### 393 **Plant material and growth conditions**

394 *Arabidopsis thaliana* ecotype Columbia (Col-0) was used as wild type (WT) control for  
395 all experiments. The mutant lines of *NKS1* (At4g30996), *nks1-1* (SALK\_151073) and *nks1-2*  
396 (GK-228H05) were obtained from the Nottingham Arabidopsis Stock Centre (NASC) (Scholl et  
397 al., 2000) whereas *qua2-1*, *esmd1-1* were gifted by Gregor Mouille (INRAE, Paris) and  
398 Stephane Verger (UPSC, Umeå, Sweden), respectively. The various endomembrane  
399 compartment specific and other marker lines used in this study were obtained from NASC  
400 and/or obtained from original source are listed in Table S6.

401 Seeds were surface sterilized in 70% ethanol with 1% bleach for 5 minutes and washed  
402 with either water or 70% ethanol (5X) and sown on square petri plates of half concentration  
403 (2.2g/L) of Murashige and Skoog (MS) nutrient mix (Duchefa), 0.5% sucrose and 0.8% (w/v)  
404 plant agar (Duchefa) which was buffered to pH 5.8 by using 2.5mM 2-  
405 Morpholinoethanesulfonic acid (MES) (Sigma-Aldrich). The seeds were stratified at 4°C for 48  
406 hours and grown in *in-vitro* growth chamber at 21°C under 16 hours of light and 8 hours of  
407 darkness (light grown seedlings).

408 For dark-grown experiments, after 48 hours of stratification, seeds were exposed to  
409 white light for 6 hours, then wrapped in aluminium foil and grown vertically in *in-vitro* growth  
410 chamber. This time point was used as start to count number of days after sowing (DAS). The  
411 growth period of seedlings varied in different experiments and details on this are mentioned  
412 in the respective figure legends.

413 After two weeks of growth in growth chambers, plants were transferred to 6 cm  
414 and/or 10 cm sized pots filled with peat substrate (made of peat, vermiculate and sand) with  
415 full nutrient supply (MPI *Arabidopsis* substrate, Stender, Germany) pre-watered with systemic  
416 fungicide (PREVICUR, Bayer Ltd, 1.5mL/L) and Boron solution (1mL/L). The plants were grown  
417 under long day conditions (16 hr light, 21°C, RH-50% and 8 hr dark, 17°C, RH-50%). Plants  
418 were genotyped using the primers indicated in Table S7 for *nks1* alleles and *qua2-1* T-DNA  
419 insertion lines. To genotype *esmd1-1*, we developed new dCAPS primers using  
420 (<http://helix.wustl.edu/dcaps/>; Neff et al., 2002) using the primers are listed Table S7. The  
421 resulting PCR fragment was subjected to restriction digestion by BseXI enzyme, generating  
422 two fragments of 500+302 bp in Col-0 and 800+1 bp in *esmd1-1*. The *esmd1-1* mutants were  
423 then confirmed by sequencing for the presence of single nucleotide polymorphism reported  
424 by Verger et al., 2016. To genotype *qua2-1*, we amplified a fragment using primers listed in  
425 Table S7 and allele was confirmed by sequencing for the presence of single nucleotide  
426 polymorphism as reported by Verger et al., 2018.

427 Various double mutants and marker lines used in this study was generated by crossing.

428

### 429 **Brightfield microscopy and histology**

430 **Hypocotyl length and time-lapse growth analysis:** Three-day and six-day old dark  
431 grown seedlings were scanned using scanner (EPSON perfection V600 photo) at 800 dots per  
432 inch (dpi) resolution. Hypocotyl lengths were measured using a segmented line in Fiji (ImageJ)  
433 software. Time lapse hypocotyl growth kinetics was done according to Jonsson et al. (2021);  
434 briefly, seedlings were grown vertically on ½ MS media were imaged using Canon D50 camera  
435 at 1 hour interval without infrared filter, and hypocotyl growth was measured using Fiji.

436 **Visualization of seed mucilage by Ruthenium Red staining assay:** Seeds were  
437 incubated in Tris 10mM (pH 7.6) and shaken vigorously on an orbital shaker for 2 h at room  
438 temperature to hydrate and release mucilage from the epidermal seed coat. This solution was

439 replaced with 800  $\mu$ l of 0.01% ruthenium red solution (11103-72-3, Sigma-Aldrich). The seeds  
440 were again shaken vigorously on an orbital shaker for 1 h. The seeds were then washed with  
441 water to remove excess stain. The seeds suspended in water were then mounted in  
442 depression slide and imaged using a compound microscope (McFarlane et al., 2014).

443 **Tissue integrity assay:** Six-day-old etiolated seedlings were stained in aqueous  
444 solution of 0.05 % (w/v) Toluidine blue for 1 min. Then, seedlings were washed gently with  
445 water once and imaged immediately using a compound microscope (Tanaka et al., 2004;  
446 Neumetzler et al., 2012).

447

#### 448 ***In silico* analyses**

449 ***NKS1* gene expression:** *NKS1* (At4g30996) gene expression patterns were accessed via  
450 ePlant (<https://bar.utoronto.ca/eplant/>; Waese et al., 2017).

451 **Coexpression analyses:** The putative functional homologs of *NKS1* gene were  
452 identified using ATTED-II (<https://atted.jp/>; Obayashi et al., 2018) and are listed in Table S1.

453 **Gene Ontology (GO) analyses:** GO analyses were conducted via the Gene Ontology  
454 Resource interface (<http://geneontology.org/>) where the top 100 co-expressed genes were  
455 uploaded and compared against the Arabidopsis genome. The outputs are listed in Table S2.

456 **Protein domain structure prediction:** Predicted protein domain architecture was  
457 accessed via InterPro (<https://www.ebi.ac.uk/interpro/about/interpro/>; Blum et al., 2021).  
458 Transmembrane spanning helices were predicted using the TMHMM Server v.2.0  
459 (<http://www.cbs.dtu.dk/services/TMHMM/>; Krogh et al., 2001).

460 **Phylogenetic analyses:** *NKS1* amino acid sequence was used to search homologues  
461 against publicly available database such as PLAZA (Van Bel et al., 2017), NCBI  
462 (<https://www.ncbi.nlm.nih.gov/>), and Phytozome (Goodstein et al., 2012). The identified  
463 protein sequences from *Arabidopsis thaliana* (At4g30996, At2g24290, At4g04360 and  
464 At2g32580), *Oryza sativa* (Os04g42340, Os03g56610), *Brachypodium distachyon* (BdiBd21-  
465 3.2G0728900.1, BdiBd21-3.5G0190400.1, BdiBd21-3.1G0094300.1), *Populus trichocarpa*  
466 (Potri.006G187800, Potri.018G111100, Potri.002G227100, Potri.004G006500,  
467 Potri.013G026900, Potri.005G038000, Potri.011G009200, Potri.011G009300, Potri.T040000),  
468 *Picea abies* (PAB00059623), *Marchantia polymorpha* (Mapoly0042s0084,  
469 Mapoly0138s0016), *Selaginella moellendorffii* (SMO358G0620), *Utricularia gibba*  
470 (UGI.Scf00506.16776, UGI.Scf00037.4142, UGI.Scf00027.3259) were used to construct  
471 phylogenetic tree according to Zhang et al. (2015). Amino acid sequences were aligned by  
472 MUSCLE algorithm at MEGA and subsequently phylogenetic tree was constructed using  
473 maximum-likelihood Le and Gascuel (LG) model. Parameter were used as phylogeny test-  
474 bootstrap method, No. of bootstrap replications-1000, Substitution type-amino acid, model-  
475 LG, rates among sites-Gamma distributed, No. of discrete Gamma categories-5.

476

#### 477 **Gene expression assay by qRT-PCR and RT-PCR**

478 Total RNA was isolated from six-day old etiolated seedlings of Col-0, *nks1-1* and *nks1-2*  
479 using RNeasy Plant mini kit (74904, QIAGEN). cDNA was synthesized from 1  $\mu$ g total RNA  
480 using iScript cDNA synthesis kit (1706691, Bio-Rad). Transcript levels were analysed from  
481 three biological replicates by real time quantitative PCR (qRT-PCR). Quantitative expression  
482 of *NKS1* was determined in wild type and *nks1* alleles by qRT-PCR using SYBR Green (Applied  
483 Biosystems) reaction mixture on an ABI PRISM 7900 HT sequence detection systems (Applied  
484 Biosystems) (PCR reaction: 50°C for 2 min, 95°C for 10 min, 40 cycles of 95°C for 15 s, and  
485 60°C for 1 min. Amplicon dissociation curves, i.e. melting curves, were recorded after cycle

486 40 by heating from 60°C to 95°C with a ramp speed of 1.9°C min<sup>-1</sup>) or CFX96 Touch Real-Time  
487 PCR detection system, Bio-Rad (PCR reaction :95°C for 5 min, 95°C for 10 sec, 60 °C for 10 sec,  
488 72°C for 15 sec. The melting curve was recorded after 39 cycle by heating from 65°C to 95°C  
489 with increment of 0.5°C.

490 The relative expression values were calculated by the 2<sup>-ΔΔCq</sup> method using  
491 Reference Gene Index (RGI). *POLYUBIQUITIN10* (At4g05320), *ACTIN2* (At3g18780), *PROTEIN*  
492 *PHOSPHATASE* (At1g13320) and SAND family protein encoding gene *SAND* (At2g28390) were  
493 used to calculate the reference gene index (Czechowski et al., 2005). The primers used to  
494 amplify *NKS1* and *FADlox* are given in Table S7.

495 Semi-quantitative RT-PCR was performed by intron spanning primers for *NKS1* (RT1FP  
496 and RT1RP; Table S7) and *APT1* gene was used as internal normalization and cDNA loading  
497 control. The 1:10 diluted cDNA prepared from 1μg of RNA was used from three biological  
498 replicates of Col-0, *nks1-1* and *nks1-2*. PCR was performed with following conditions: 94°C for  
499 10 sec, 58°C for 30 sec, 72°C for 1 min.

500

### 501 **Bimolecular Fluorescence Complementation (BiFC)**

502 **Cloning BiFC constructs:** *NKS1* (At4g30996), *QUA1* (At3g25140), *QUA2*(At1g78240),  
503 *Got1P* homolog (At3g03180) (Zhang et al., 2016) and *IAA1* (At4g14560) (Pandey et al., 2018)  
504 were PCR amplified from Arabidopsis Col-0 cDNA using forward primer with attB1 and reverse  
505 primer with attB2 site; all primers are listed in Table S7. The PCR fragment was cloned into  
506 pDONR207 using BP Clonase Enzyme II (Cat No. 11789020, Thermo Scientific) mix at 25°C.  
507 Entry clones were then sub-cloned into BiFC specific destination vectors (pDEST-gwVYCE and  
508 pDEST-gwVYNE) (Gehl et al., 2009) using Gateway LR Clonase II Mix kit (Cat. No. 17791100,  
509 Thermo Scientific). The clones confirmed by PCR and restriction digestions.

510 **Preparation and transient expression in *Arabidopsis* root suspension culture**  
511 **protoplasts:** Arabidopsis root suspension culture were grown in 25 mL of Murashige and  
512 Skoog (MS) media (4.33 g/L MS Salts (Duchefa), 2 ml/L B5 vitamin stock, 3% sucrose, 0.24  
513 mg/L 2,4-D, 0.014 mg/L ketenine, dissolved in de-ionized water and set pH to 5.7) at 22°C for  
514 4 days. Protoplasts were isolated in enzyme solution (1% Cellulase (Onozuka R-10), 0.2%  
515 Macerozyme (Serva) in B5+0.34 M Glucose Mannitol (GM) solution (4.4 g/L MS (Duchefa),  
516 30.5 g/L Glucose (VWR Chemicals), 30.5 g/L Mannitol (Sigma), pH to 5.5 with KOH) with slight  
517 shaking for 3-4 h and afterwards centrifuged and washed with B5+0.34M GM at 192g for 5  
518 minutes. The pellet was dissolved in B5+0.28 M sucrose. 5μg of each plasmid was mixed in 50  
519 μL of protoplast suspension and 150 μL of 25% PEG 6000 solution, then incubated in dark for  
520 20 minutes and the reaction was stopped by addition of 500 μL 0.275 M Ca(NO<sub>3</sub>)<sub>2</sub> followed by  
521 centrifugation for 1 minutes at 123g. Supernatant was discarded and 500 μL of MS+0.34 M  
522 GM was added to the cells which were then incubated in dark for 16h.

523 **Confocal imaging:** Transfected protoplasts were mounted under a coverslip separated  
524 from the slide with double sided tape and viewed with x20 or x40 (water immersion)  
525 objectives of Zeiss LSM880 confocal scanning microscope. The YFP fluorescence was excited  
526 at 514nm and emission spectra was detected in spectral range of 500-600nm. Lambda  
527 wavelength mode of imaging used to confirm peak signal emission spectra.

528

### 529 **GO-PROMPTO assay**

530 **Cloning & plant transformation:** Modified GO-PROMPTO assay (Søgaard et al., 2012)  
531 with VENUS as the fluorescent marker (Lampugnani et al., 2016) was used to determine the  
532 topology of *NKS1*. The *NKS1* CDS was amplified with Sfol-forward primer and KpnI- reverse

533 primer (Table S7) and cloned into an SfoI- and KpnI-linearized pSUR. The constructs generated  
534 were verified through sequencing and transformed into the AGL1 strain of *A. tumefaciens* by  
535 electroporation with the helper plasmid pSOUP. Transient expression in *N. benthamiana*  
536 leaves and imaging was carried out as previously described in (Sanchez-Rodriguez et al.,  
537 2018).

538

### 539 **Generation of NKS1-GFP/RFP translational fusion constructs**

540 The coding sequence of NKS1 with or without stop codon was amplified by PCR using  
541 gene specific primers (Table S7) from cDNA using Phusion High-Fidelity DNA polymerase  
542 (F530S, NEW ENGLAND BioLabs, Inc) or PrimeSTAR HS DNA polymerase (R010A, Takara  
543 Clontech Ltd). The fragments were introduced into pENTR-D-TOPO vector by pENTR™  
544 Directional TOPO Cloning Kit (K2400-20, Life Technologies). pENTR-D-TOPO-NKS1 with or  
545 without stop codon was subsequently cloned into pUBN-GFP/RFP-NKS1 (N-terminal fusion)  
546 and pUBC-NKS-GFP/RFP (C-terminal fusion) plant expression vectors (Grefen et al., 2010) by  
547 Gateway LR clonase mix (11791-019, Life Technologies). The resultant constructs were  
548 transformed into *Agrobacterium tumefaciens* GV3101, which was used to transform  
549 *Arabidopsis* Col-0, *nks1-1*, and *nks1-2* via floral dip (Clough SJ and Bent AF., 1998).

550

### 551 **Live cell imaging**

#### 552 **Low water potential treatment and imaging of cell-cell adhesion defect phenotype:**

553 Water potential of ½ MS growth media was changed as described in Verger et al., 2018.  
554 Briefly, seedlings were grown on ½ MS media with 0.8% or 2.5% agar and hypocotyl growth  
555 was measured on six-day old dark grown plates. To check the cell adhesion defect, five-day  
556 old etiolated hypocotyls were stained with 0.2 mg/mL propidium iodide for 15 min. The  
557 seedlings were washed in water before imaging. The 3<sup>rd</sup> or 4<sup>th</sup> cell of basal part of hypocotyl  
558 from hypocotyl-root junction was used to image cell-adhesion defect (Verger et al., 2018).  
559 The seedlings were imaged using Zeiss LSM 780 or 880 confocal laser scanning microscope  
560 (25X objective, N.A. 0.8) with excitation of 514 nm and emission was detected in the range of  
561 600-650nm. The images were analysed using Fiji software. Initially, images were processed  
562 such as background subtraction was done using rolling ball radius of 20 pixels. The Z-stack  
563 projection was performed using sum slices. All the acquisition and processing steps were  
564 similar in all genotypes.

565 **Spinning disk microscopy:** All other live cell imaging was conducted using CSU-X1  
566 Yokogawa spinning disc head fitted to a Nikon Ti-E inverted microscope, a CFI APO TIRF X100  
567 N.A. 1.49 oil immersion objective, an evolve charge-coupled device camera (Photometric  
568 Technology) and a X1.2 lens between the spinning disc and camera. GFP was excited at 491  
569 nm and mCherry at 561 nm using a multichannel dichroic and an ET525/50M or an  
570 ET595/50M band pass emission filter (Chroma Technology) for GFP/YFP and mCherry  
571 fluorophores, respectively. Alternatively, live cell imaging was conducted with an inverted  
572 Nikon Ti-E with an Andor Revolution CSU-W1 spinning disk, an Andor FRAPPA photobleaching  
573 unit, two Andor iXon Ultra 888 EM-CCD cameras, and 100x or 60x N.A. 1.49 Apo TIRF oil-  
574 immersion objectives. GFP was excited with a 488 nm laser and emission collected with a  
575 525/50 nm band pass filter; YFP was excited with a 515 nm laser and emission collected with  
576 a 535/30 nm filter; mCherry and RFP were excited with a 561 nm laser and emission collected  
577 with a 610/40 nm filter.

578 **Sample preparation:** For seedling imaging, 3-day-old etiolated hypocotyls or roots  
579 were mounted in water under a pad of 0.8% agarose (Biolone). To limit the time that seedlings

580 spent mounted, no more than three cells per seedling were imaged in any experiment. For  
581 BFA-treatments, seedlings treated with BFA (50 $\mu$ M) diluted in ½ MS media with 1% sucrose  
582 for timepoints indicated and washout was performed with ½ MS media with 1% sucrose. FM4-  
583 64 straining was performed for 10 minutes with 2 $\mu$ M FM4-64.

584 **Simultaneous dual wavelength imaging:** For double Golgi marker colocalization and  
585 Golgi-TGN colocalization, both channels were excited simultaneously and emission was  
586 collected simultaneously using the excitation and emission parameters described above and  
587 two Andor iXon Ultra 888 EM-CCD cameras to eliminate time-lag between collecting two  
588 channels (collected at ~400ms exposure each), and potential displacement due to the rapid  
589 cytoplasmic streaming of Golgi bodies and TGN (up to 4.2  $\mu$ m/s; Nebenführ et al., 1999). z-  
590 stacks were collected with 0.2  $\mu$ m spacing using the 100x N.A. 1.49 objective.

591

### 592 **Live cell image analyses**

593 All image processing was performed using Fiji software. For analysis involving  
594 measurement of signal intensity, only linear adjustment were made. For other images,  
595 background signal was reduced using the 'Subtract Background' tool (rolling ball radius of 20  
596 to 30 pixels). Image drift was corrected using the Fiji plugin StackReg (Thevenaz et al., 1998).

597 **Co-localization:** Co-localization between NKS1-GFP or NKS1-RFP and compartment  
598 marker lines was analysed as described by (Gendre et al., 2011; Boutte et al., 2013; Gendre  
599 et al., 2013). All images were analysed using JACoP plugin in Fiji (Bolte and Cordelieres, 2006)  
600 using the appropriate hardware settings from the microscope, but otherwise default  
601 parameters.

602 **Simultaneous dual wavelength imaging:** Images from the two cameras were aligned  
603 relative to a calibration slide, then regions of interest were selected from 3 cells per seedling  
604 for colocalization analysis. Colocalization was quantified from z-stacks (with 0.2  $\mu$ m spacing  
605 using the 100x N.A. 1.49 objective) using the DiAna plugin for Fiji (Gilles et al., 2017) with the  
606 following parameters for DiAna-Segment: no filtering, manual thresholding, object size >10  
607 pixels and then DiAna-Analyze was used to measure centre-centre distance between the  
608 segmented objects.

609 **CESA speed and density measurements:** Wild type and *nks1-2* GFP-CESA3 seedlings  
610 were imaged with 10 sec time intervals for 600 sec. Background signal was reduced using the  
611 'Subtract Background' tool (rolling ball radius of 20 to 30 pixels). If necessary, image drift was  
612 corrected using the Fiji plugin: StackReg (Thevenaz et al., 1998). CESA speed and density were  
613 determined according to Sampathkumar et al. (2013).

614 **Golgi speeds:** Golgi movement was tracked using Fiji-TrackMate (Tinevez et al., 2017).  
615 Golgi were detected as particles of 10 pixels and then linked in different frames using simple  
616 linear assignment problem tracker with a maximum linkage distance of 15 pixels, a maximum  
617 gap closing distance of 15 pixels, and a maximum frame gap number of 3. The parameter  
618 "Mean Speed" was used to calculate the average Golgi motility rate.

619 **FM4-64 internalization:** Wild type and *nks1-2* roots were treated with BFA (50 $\mu$ M) for  
620 30 minutes and FM4-64 (2 $\mu$ M) for 10 minutes, then mounted and imaged. Maximum  
621 fluorescence intensities of BFA bodies were measured and compared to the plasma  
622 membrane intensities using Fiji (Gadeyne et al., 2014).

623 **PIN2-GFP recycling:** For PIN2-GFP quantification, plasma membrane signal was  
624 measured using a segmented line drawn along the apical surface of the plasma membrane of  
625 a cell and intracellular signal was measured within a hand-drawn polygon and the mean signal  
626 intensities were measured in Fiji and used to calculate the ratio of plasma

627 membrane:intracellular signal. The number of BFA bodies within this polygon were manually  
628 counted then its area was measured in Fiji and used to calculate the number of BFA bodies  
629 per unit area.

630

### 631 **Cell wall analyses**

632 Cell wall analyses were conducted on 6-day-old etiolated seedlings of Col-0, *nks1-1*,  
633 *nks1-2*. The seedlings were harvested in 70% ethanol and the seed coats were removed  
634 carefully from seedlings. The cleaned seedlings were collected in 2 mL Eppendorf tube and  
635 washed with 70 % ethanol. The ethanol was completely evaporated by drying seedlings at 60°  
636 C overnight. The dried samples were grounded by Retsch Mill (Retsch Inc.) for 3 minutes at  
637 30 Hz, then washed once with 70% ethanol and ground for 1 more min. The content was  
638 vortexed thoroughly and spun down at 14,000 rpm for 10 min. The pellet was then washed  
639 twice with chloroform: methanol (1:1 v/v). The resultant pellet was washed with acetone, and  
640 dried overnight to obtain cell wall material (CWM).

641 **Preparation of samples via acid hydrolysis:** 0.5 to 1 mg of dried CWM was weighed in  
642 screw capped Eppendorf tubes. An internal standard (30µg of inositol) was added to the  
643 CWM. 250 µL of 2M trifluoroacetic acid (TFA) was added to the pellet and incubated at 121°C  
644 for 1 hour in a heating block. The TFA was later evaporated by washing with isopropanol thrice  
645 under a steam of dried air. 300 µL of water was added to the pellet and mixed by vortexing  
646 followed by sonication. The mix was spun down at 14,000 rpm for 10 min. The pellet was  
647 dried overnight and used by cellulose estimation for modified Seaman analysis (Selvendran  
648 and O'Neill, 1987).

649 **Estimation of cellulose content:** The hexose content was estimated by the Anthrone  
650 assay (Updegraff, 1969). The pellet was dissolved in 175 µL of 72% sulphuric acid by shaking  
651 and vortexing. Then 425 µL of water was added and mixed well. 100 µL of sample was used  
652 to estimate hexose content. 200 µL of 0.2% anthrone reagent was added to the sample.  
653 Glucose standards were prepared along with the sample. The content was boiled at 121°C for  
654 5 min. 200 µL of sample was loaded into a microtiter plate and absorbance was measured at  
655 640 nm in photometer. The cellulose content in sample was calculated from D-Glu standard  
656 curve.

657 **Monosaccharide analysis:** Alcohol insoluble residue (AIR) was prepared, and pectin  
658 and hemicellulose fractions were extracted sequentially as previously described  
659 (Rautengarten et al., 2019). AIR (10-15 mg) obtained from dark-grown hypocotyls was  
660 extracted using 50 mM CDTA (pH 6.5), 50 mM Na<sub>2</sub>CO<sub>3</sub>, 1 M and 4 M KOH for 2 h at room  
661 temperature and 16 h at 4°C. CDTA fractions were combined and dialyzed against 50 mM  
662 sodium acetate, pH 5.5. Sodium carbonate fractions were combined and neutralized with  
663 acetic acid. The 1 M KOH and 4 M KOH fractions were similarly combined and neutralized with  
664 concentrated HCL. All the fractions were further dialyzed three times 16 h at 4°C against de-  
665 ionized water and lyophilized. The remaining insoluble residue (pellet) was washed with  
666 water, 70% (v/v) ethanol, and acetone and dried. Total alcohol insoluble residue or  
667 corresponding cell wall fractions were hydrolyzed in 2 N trifluoroacetic acid (TFA) for 1 h at  
668 120°C. High-Performance anion exchange chromatography (HPAEC) coupled with pulsed  
669 amperometric detection (PAD) was performed on an ICS 5000 device (Dionex) using a  
670 CarboPac PA20 (3 × 150 mm) anion-exchange column (Dionex) (Rautengarten et al., 2016).

671

### 672 **Immunoprecipitation of NKS1-GFP and interactors**

673           **Protein extraction:** 7-day-old NKS1-GFP seedlings were grown in liquid ½ MS pH 5.8  
674 with 1% sucrose and snap frozen in liquid nitrogen, freeze-dried for 5 hours in a LSCplus  
675 Freeze Drier (Christ), and stored at -80°C until further analysis. 3 independent experiments of  
676 3 (E1, E2) or 2 (E3) biological replicates (1 flask of seedlings for each replicate) were performed  
677 for a total of 8 biological replicates. Dried samples were ground with mortar and pestle in  
678 liquid nitrogen. Total protein was extracted using an extraction buffer comprised of 50 mM  
679 MOPS (M1254, Sigma) pH 7.0, 2 mM EDTA (798681-1KG, Sigma), 2 mM EGTA (E4378-25G,  
680 Sigma), along with 1 tablet of cOmplete™ EDTA-free protease inhibitor cocktail (5056489001,  
681 Roche) per 50 mL of buffer. The homogenized solution was centrifuged at 3,270 g in an  
682 Optima L-80 Ultracentrifuge with a 70.1 Ti rotor (Beckmann). The supernatant was  
683 centrifuged again for 1 h at 100,000g in the same equipment to extract the microsomes. The  
684 microsomal pellet was resuspended in pellet buffer of 10 mM Tris-HCl (Sigma) pH 7.5, 150  
685 mM NaCl, 0.5 mM EDTA and 0.5% NP-40. Protein was quantified using Pierce Bicinchoninic  
686 Acid (BCA) assay kit (Thermo). The samples were adjusted to get at least 480 µg of protein.  
687 The next steps were performed on ice. GFP-Trap A beads (CT-gta-20, BioNovus Life Sciences)  
688 were conditioned with two washes using a dilution buffer that consisted of 10 mM Tris-HCl  
689 pH 7.5, 150 mM NaCl, 0.5 mM EDTA. Proteins were bound to the beads by adding 500 µL of  
690 microsomal fraction proteins in pellet buffer and samples were tumbled for 1h at 4° C. Then,  
691 they were centrifuged at 2,500 g for 2 minutes at 4°C. Samples were washed with 500 µL of  
692 pellet buffer three times, and twice with dilution buffer. Then, 25 µL Elution buffer I,  
693 consisting of 50 mM Tris-HCl pH 7.5, 2 M urea, 5 µg/mL Mass Spec Trypsin/Lys-C Mix (V5073,  
694 Promega) and 1 mM DTT was added to the samples, and incubated in a thermomixer at 30 °C  
695 at 400 rpm for 30 min. Then, samples were centrifuged at 2,500x g for 2 minutes at 4°C, and  
696 the supernatants were transferred to a fresh vial. A second and third elution was made using  
697 50 µL of 50 mM Tris-HCl pH 7.5, 2 M urea, 5 mM iodoacetamide (I6125, Sigma) buffer, twice.  
698 The samples were dried on RVC 2-33 CDplus (John Morris) speed-vacuum evaporator for 1.5  
699 h. The dried samples were stored at -20°C.

700           **Mass spectrometry:** Samples were analyzed using liquid chromatography with  
701 tandem mass spectrometry (LC MS/MS) on Orbitrap Fusion Lumos Tribrid mass spectrometer  
702 and an Ultimate 3000 RSLC nano system (Thermo Scientific). Dried samples were resuspended  
703 in 5% acetonitrile, 1% trifluoroacetic acid; 6 µL of sample were injected for pulldown fractions.  
704 The samples were trapped on a PepMap 300 µm × 1 mm (C18, 5 µm, 100 Å) precolumn and  
705 separated on an Acclaim PepMap RSLC 75 µm × 50 cm (C18, 2 µm, 100 Å) column (Thermo  
706 Scientific). The flow rate was 220 nL·min<sup>-1</sup> with a total analysis time of 90 minutes. The  
707 experiments were performed using a nano electrospray ionization source at positive mode  
708 and Fusion Lumos Orbitrap mass spectrometer (Thermo Fisher Scientific). The mass  
709 spectrometry data was acquired on for one full scan MS mode and as many data dependent  
710 HCD-MS/MS spectra as possible. All mass spectrometry data were acquired using Orbitrap  
711 mass analyzer.

712           **Data analysis:** Peptide identification was performed on Proteome Discoverer (v.2.3  
713 Thermo) searching the Arabidopsis database (TAIR10) and label free quantification was  
714 performed using the Minora Feature Finder. A total of 2,760 proteins were identified.  
715 Statistical analysis was performed using RStudio (v3.6.2). Interaction candidates were quality  
716 filtered based on the following criteria: ≥10% coverage, ≥ 2 peptides, FDR ≤ 0.05, Score ≥ 10,  
717 ≥ 1 unique peptide, resulting in 407 proteins. To select the candidates the samples were  
718 further filtered selecting for those with an average abundance across all experiments ≥100,  
719 found with 'high' confidence in all rounds, and present in at least 6 samples, resulting in 248



720 proteins. We then used SUBA (Hooper et al., 2017) to narrow down potential candidates. AGIs  
721 corresponding to the proteins identified above the quality control thresholds described were  
722 input to SUBA and filtered for “Location All Predictors” containing the term “golgi”. This  
723 generated a very loose filter for any proteins that were identified as possibly Golgi-localized  
724 by any predictor curated by SUBA, resulting in 94 proteins. To identify high confidence  
725 candidates, the resultant list was cross-referenced with 3 others, published Golgi proteomes  
726 (Nikolovski et al., 2012; Parsons et al., 2012; Parsons et al., 2019). The final candidates list  
727 (Table S4) includes 37 proteins that appear at least once in one of the Golgi proteomes, while  
728 also detected in the NKS1 pulldown in all three experiments and at least six out of eight  
729 biological replicates.

730

### 731 **Transmission electron microscopy (TEM) & transmission electron tomography (ET)**

732 For both TEM and tomography, etiolated 3-day-old seedlings were cryofixed using a  
733 Leica HPM-100 high pressure freezer using 1-hexadecene as a cryoprotectant and B-type  
734 carriers, according to McFarlane et al. (2008). Freeze-substitution was performed in in 2%  
735 (w/v) osmium tetroxide (Electron Microscopy Sciences) and 8% 2,2-dimethoxypropane (w/v)  
736 in anhydrous acetone using a Leica AFS2 automatic freeze substitution unit at -85°C for 4 days,  
737 then the temperature was gradually raised to room temperature over 2 days. Samples were  
738 washed 5 times with anhydrous acetone, then infiltrated with Spurr’s Resin (Electron  
739 Microscopy Sciences) over the course of 4 days. Resin-infiltrated samples were polymerized  
740 at 65°C for 36 hours.

741 **TEM:** ~80 nm thick (silver) sections were cut using a UC7 Ultramicrotome and a  
742 DiATOME diamond knife, placed on Gilder fine bar hexagonal 200 mesh grids coated with  
743 0.3% formvar (Electron Microscopy Sciences). Grids were post-stained with 1% aqueous  
744 uranyl acetate (Polysciences) and Sato’s triple lead (sodium citrate, lead acetate, lead citrate  
745 from BDH, lead nitrate from Fisher) and imaged with a Phillips CM120 BioTWIN transmission  
746 electron microscope with a Gatan MultiScan 791 CCD camera and a tungsten filament at an  
747 accelerating voltage of 120 kV. Golgi features of genotype-blinded images were manually  
748 measured in Fiji.

749 **ET:** 5 serial sections ~250-300 nm thick (green) were cut were cut using a UC7  
750 Ultramicrotome and a DiATOME diamond knife, placed on Maxtaform copper/rhodium 2x1  
751 mm slot grids coated with 0.8% formvar (Electron Microscopy Sciences), post-stained 1%  
752 aqueous uranyl acetate (Polysciences) and Sato’s triple lead (sodium citrate, lead acetate,  
753 lead citrate from BDH, lead nitrate from Fisher), and then coated with 15 nm colloidal gold  
754 (Ted Pella) as a fiducial marker. Samples were imaged with a FEI Tecnai F30 transmission  
755 electron microscope at an accelerating voltage of 300 kV equipped with a CETA 4x4k CMOS  
756 camera. Dual-axis tomograms were collected in a tilt range of +65° to -65° with 2° tilt steps  
757 per image per image thereafter using FEI Explore3D automated tomography acquisition  
758 package with manual rotation of the sample by ~90° between collection of the two tilt axes.  
759 Tomograms were aligned, reconstructed, and modelled in Etomo and IMOD (Kremer et al.,  
760 1996). In Etomo, fiducial gold on both sides of the section were used for alignment and 22  
761 iterations of SIRT (Simultaneous Iterative Reconstructive Technique) was used for  
762 reconstruction. Dual-axis tomograms were aligned using fiducial markers from both  
763 tomograms then combined using Etomo. Tomograms were manually segmented using IMOD;  
764 Golgi cisternae and TGN were modelled manually as closed objects every 3 slices without  
765 interpolation, while vesicles were modelled as spherical scattered objects seeded at the

766 section in which they displayed maximum diameter; after modelling, all surfaces were  
767 meshed and equally smoothed using the smoothsurf function in IMOD over 12 sections.

768

### 769 **Cryo scanning electron microscopy**

770       Etiolated 3-day-old seedlings were processed according to McFarlane et al. (2021).  
771 Seedlings were mounted in Tissue-Tek (Sakura-Finetek) on a sample holder, plunge-frozen in  
772 a liquid nitrogen slush (roughly -210°C), then transferred to a Gatan cryostage. Ice crystals  
773 were evaporated at -95°C for 2.5 minutes, coated with 60:40 gold-palladium alloy for 120  
774 sec (about 6 nm) under argon at -120°C, and then transferred into the FEI Quanta cryo  
775 scanning electron microscope. To ensure that cell separation was not an artefact of sample  
776 preparation, wild type, *nks1-1*, and *nks1-2* seedlings were mounted on the same sample  
777 holder and processed together. Stage temperatures were maintained below -120°C while  
778 images were collected at accelerating voltage of 5 kV and working distance of 10 mm using  
779 the E-T detector.

780

### 781 **Statistical analyses**

782       Statistical tests were conducted using SPSS (IBM Corp.); sample sizes and details of  
783 each statistical test are presented in figures and figure legends.

784

785 **FIGURES:**

786 **Figure 1: *nks1* mutants are defective in cell elongation.**

787 (A) Quantitative reverse-transcription polymerase chain reaction (qRT-PCR) of *NKS1*  
788 transcript levels normalized to relative gene index (RGI) from Col-0, *nks1-1* and *nks1-2*; bars  
789 represent means of three biological replicates  $\pm$ SD. (B) Representative images of six-day old  
790 etiolated seedlings of Col-0, *nks1-1* and *nks1-2*. (C) Quantification of hypocotyl lengths from  
791 six-day-old etiolated seedlings of Col-0, *nks1-1* and *nks1-2*; data distribution is outlined by the  
792 shape, plot box limits indicate 25<sup>th</sup> and 75<sup>th</sup> percentiles, whiskers extend to 1.5 times the  
793 interquartile range, median is indicated by a horizontal line, mean by a red dot, individual  
794 data points are shown, and n (seedlings) is indicated in parentheses. (D) Etiolated hypocotyl  
795 growth kinematics of Col-0, *nks1-1* and *nks1-2* seedlings (n=15 seedlings); points indicate  
796 mean  $\pm$ SD. (E) Representative images of pUB10-GFP-NKS1 and pUB10-NKS1-GFP expressed  
797 in the *nks1-2* background along with controls (Col-0 and *nks1-2*). Letters in (A) and (C) specify  
798 statistically significant differences among samples as determined by one way ANOVA  
799 followed by Tukey's HSD test ( $p < 0.05$ ). Scale bars represent 2 mm in (B) and 5 mm in (E).

800

801 **Figure 2. Functional NKS1-GFP fusion is localized to the *medial*-Golgi apparatus.**

802 (A) Representative images NKS1 localization to endomembrane compartments; both N- and  
803 C-terminal GFP fusion construct localization in single focal plane images of hypocotyl  
804 epidermal cells of 3-day-old etiolated seedlings. (B) Quantification of co-localization between  
805 NKS1 and various endomembrane compartments specific markers. (C), (D) and (E)  
806 Representative images of colocalization between NKS1-GFP and Golgi cisternae markers:  
807 NAG-GFP (*cis*-Golgi), XYLT-mRFP (*medial*-Golgi) and ST-mRFP (*trans*-Golgi) in hypocotyl  
808 epidermal cells of 3-day-old etiolated seedlings. (F) Quantification of colocalization  
809 percentage between NKS1 and Golgi-cisternae specific markers. In bar charts, bars represent  
810 mean  $\pm$ SD, n (cells, one cell imaged per seedling) is indicated in parentheses. Scale bars  
811 represent 5  $\mu$ m in (A), (C), (D) and (E).

812

813 **Figure 3: *nks1* mutants are defective in Golgi apparatus structure and function.**

814 (A) Representative images of simultaneous dual wavelength localization of *cis*-Golgi (NAG)  
815 and *trans*-Golgi (ST) dual markers in Col-0 and *nks1-2* hypocotyl epidermal cells of 3-day-old  
816 etiolated seedlings. (B) Linescan graph showing distance between *cis*-Golgi (NAG) and *trans*-  
817 Golgi (ST) dual markers in Col-0 and *nks1-2* from single Golgi particle shown in A. (C)  
818 Quantification of the distance between *cis*-Golgi (NAG) and *trans*-Golgi (ST) dual markers or  
819 medial-Golgi (WAVE18) and TGN (VHAa1) dual markers in Col-0 and *nks1-2* hypocotyl  
820 epidermal cells of 3-day-old etiolated seedlings. (D) Quantification of Golgi (WAVE 18) speed  
821 in Col-0 and *nks1-2* cells. (E) Representative transmission electron microscopy images of Golgi  
822 ultrastructure from Col-0, *nks1-1* and *nks1-2* hypocotyl epidermal cells of 3-day-old etiolated  
823 seedlings. (F) Quantification of the frequency of Golgi curving in Col-0 and *nks1* alleles.  
824 Statistically significant numbers are shown in bold green color ( $p < 0.05$ ,  $\chi^2$  test, 1 d.f.). (G)  
825 Representative electron tomogram models of Col-0 and *nks1-2* Golgi apparatus; the *cis*-most  
826 cisterna is labelled in yellow, the *trans*-most cisterna in purple, and cisternae between are  
827 labelled by a gradient of green through blue, the TGN is labelled in pink and free vesicles in  
828 grey. (H) Quantification of SecGFP secretion ratio in Col-0 and *nks1-2* hypocotyl epidermal  
829 cells of 3-day-old etiolated seedlings. Asterisks in (C), (D) and (H) indicate statistically  
830 significant difference between Col-0 and *nks1* as determined by unequal variance, two tailed  
831 Student's t test, where \*\*\* $p < 0.0005$ , \*\* $p < 0.005$ . In violin plots, data distribution is outlined

832 by the shape, plot box limits indicate 25<sup>th</sup> and 75<sup>th</sup> percentiles, whiskers extend to 1.5 times  
833 the interquartile range, median is indicated by a horizontal line, mean by a red dot and  
834 individual data points are shown, and n is indicated in parentheses. Scale bars represent 10  
835  $\mu\text{m}$  in (A), and 200 nm in (E) and (G).

836

837 **Figure 4: *nks1* mutants are defective in cell adhesion and cell wall pectins.**

838 (A) Representative scanning electron microscopy of 5-day old etiolated seedlings of Col-0,  
839 *nks1-1* and *nks1-2*. (B) Higher magnification of the seedlings shown in (A) showing epidermal  
840 cell layer in Col-0 and *nks1* alleles. (C) GalA levels in Col-0, *nks1-1* and *nks1-2* in the CDTA-  
841 extracted cell wall fraction as measured by HPAEC-PAD. (D) Seed Mucilage staining of Col-0,  
842 *nks1-1* and *nks1-2* with Ruthenium Red solution. Asterisks in (C) indicate statistically  
843 significant difference between Col-0 and *nks1-2* as determined by unequal variance, two  
844 tailed Student's t test, where \*\*\* $p < 0.0005$ , \* $p < 0.05$ . Data is shown in boxplot where plot  
845 box limits indicate 25<sup>th</sup> and 75<sup>th</sup> percentiles, whiskers extend to 1.5 times the interquartile  
846 range, median is indicated by a horizontal line, mean by a red dot and individual data points  
847 are shown, and n (distinct pools of homogenized seedlings) is indicated in parentheses. Scale  
848 bars represent 200 $\mu\text{m}$  in (A), 50 $\mu\text{m}$  in (B), 200 $\mu\text{m}$  in (D).

849

850 **Figure 5: NKS1 interacts with QUA1 and QUA2.**

851 (A) Representative z-projections (sum averages) of confocal stacks from propidium iodide-  
852 stained etiolated five-day old hypocotyl epidermal cell files from Col-0, *nks1-2*, *esmd1-1* and  
853 two independent lines of *esmd1-1 nks1-2* double mutants. (B) Quantification of hypocotyl  
854 lengths of six-day old etiolated seedlings from Col-0, *nks1-2*, *esmd1-1* and *esmd1-1 nks1-2*  
855 double mutants. (C) Representative z-projections (sum averages) of confocal stacks from  
856 propidium iodide-stained etiolated five-day old hypocotyl epidermal cell files from Col-0,  
857 *nks1-2*, *qua2-1*, and two independent lines of *qua2-1nks1-2* double mutants. (D)  
858 Quantification of hypocotyl lengths of six-day old etiolated hypocotyls from Col-0, *nks1-2*,  
859 *qua2-1* and *qua2-1 nks1-2* double mutants. (E) UpSet Plot comparing proteins identified in  
860 three independent NKS1-GFP immunoprecipitation experiments, compared to previously  
861 published Golgi proteomes, where total set size is indicated at the lower left and intersection  
862 set sizes (with intersections defined by joined dots) are indicated in the upper bar chart; blue  
863 set indicates 37 Golgi-localized proteins identified in all three experiments and in at least 6/8  
864 biological replicates. Insert indicates relative abundance of NKS1, QUA1, and QUA2 in each  
865 independent experiment (n=8, two or three samples each in three independent experiments).  
866 (F) Representative images of bimolecular fluorescence complementation (BiFC) assay in  
867 Arabidopsis root cell culture protoplasts showing interaction between NKS1 (-cYFP) and QUA1  
868 (GAUT8) (-nYFP). IAA1-cYFP and IAA1-nYFP was used as a positive control and NKS1 (-cYFP)  
869 and Got1P homolog (-nYFP) as negative control. Letters in (B) and (D) specify statistically  
870 significant differences among samples as determined by one way ANOVA followed by Tukey's  
871 HSD test ( $p < 0.05$ ). In violin plots, data distribution is outlined by the shape, plot box limits  
872 indicate 25<sup>th</sup> and 75<sup>th</sup> percentiles, whiskers extend to 1.5 times the interquartile range,  
873 median is indicated by a horizontal line, mean by a red dot and individual data points are  
874 shown, and n (seedlings) is indicated in parentheses. Scale bars represent 5 $\mu\text{m}$  in (A) and (C);  
875 10 $\mu\text{m}$  in (F).

876

877

878

879 **SUPPLEMENTAL MATERIAL:**

880 **Figure S1: *NKS1* gene structure and characterization of *nks1* alleles.**

881 (A) Schematic map of the *NKS1* (At4g30996) gene, with position of *nks1-1* and *nks1-2* allele T-  
882 DNA insertions indicated. Black and white box indicate coding and non-coding regions,  
883 respectively and lines indicate introns. Green arrow shows position of primers used to amplify  
884 *NKS1* gene from CDNA. qRT2FP and qRTFP2RP (purple arrows) were used to perform  
885 quantitative real time PCR and whereas RT1FP and RT1RP (red arrows) were used to perform  
886 semi-quantitative RT-PCR. (B) Semi-quantitative RT-PCR analysis of *NKS1* transcript levels in  
887 three biological replicates of Col-0, *nks1-1* and *nks1-2* with *APT1* as a control. All primers used  
888 for this study are listed in Table S7. (C) ePlant eFP viewer (Waese et al., 2017) representing  
889 *NKS1* expression throughout the different Arabidopsis tissues depicted, according to the  
890 indicated colour scale.

891

892 **Figure S2: Functional *NKS1*-GFP is localized to Golgi apparatus and not the TGN or other**  
893 **endomembrane compartments.**

894 (A) Representative confocal images showing co-localization of *NKS1*-GFP/RFP with markers  
895 for the endoplasmic reticulum (GFP-HDEL), *trans*-Golgi network (TGN; VHAA1-mRFP), and late  
896 endosomes (RFP-WAVE7 and RFP-WAVE2) in 3-day old etiolated hypocotyl epidermal cells.  
897 (B) Representative images of *NKS1*-GFP co-localization with Golgi marker (XYLT-mRFP) or TGN  
898 marker (VHAA1-mRFP) after 60-minute BFA-treatment of 3-day old root epidermal cells. Scale  
899 bars represent 5µm in (A) and (B).

900

901 **Figure S3: *NKS1* is a plant specific, transmembrane DUF1068 protein.**

902 (A) Phylogenetic analysis of full length *NKS1* protein family. Amino acid sequences from  
903 *Arabidopsis thaliana* (4), *Populus trichocarpa* (9), *Oryza sativa* (2), *Brachypodium distachyon*  
904 (3), *Picea abies* (1), *Marchantia polymorpha* (2), *Selaginella moellendorffii* (1), and *Utricularia*  
905 *gibba* (1) were used for sequence alignment and tree construction. The clustered associated  
906 taxa are shown in percentage near the branches. The tree is constructed to scale with branch  
907 length measured in number of substitutions per site. (B) *NKS1* is type II transmembrane  
908 protein as predicted by TMHMM Server v. 2.2; CBS Denmark. (C) Representative images of *N.*  
909 *benthamiana* leaf epidermal cells transiently transformed with V(I152L)N-ST, lumen facing  
910 reporter. Green signal in VC-*NKS1*+V(I152L)N-ST indicates that two proteins are on the same  
911 side of Golgi membrane. (D) Schematic representation of various domains known in *NKS1*  
912 protein sequence predicted via InterPro (<https://www.ebi.ac.uk/interpro/>). *NKS1* amino acid  
913 directs to IPR010471 entry at InterPro. Numbers represents positions of various domains in  
914 *NKS1* protein sequence, TM-transmembrane domain (PHOBIUS, TMHMM entry); SignalP-TM  
915 (SIGNALP-GRAM\_POSITIVE entry); CC-Coil (COILS entry), cytoplasmic and non-cytoplasmic  
916 domains (PHOBIUS entry).

917

918 **Figure S4: Golgi function is impaired in *nks1* mutants, but TGN structure and function is**  
919 **unaffected by loss of *NKS1*.**

920 (A) Representative confocal images of ratiometric SecGFP Col-0 and *nks1-2* hypocotyl  
921 epidermal cells of 3-day-old etiolated seedlings. (B) Representative images of simultaneous  
922 dual wavelength localization of Golgi (WAVE18) and *trans*-Golgi Network (VHAA1) dual  
923 markers in Col-0 and *nks1-2* hypocotyl epidermal cells of 3-day-old etiolated seedlings and  
924 linescan graph showing distance between dual markers in Col-0 and *nks1-2* from single Golgi-  
925 TGN object. (C) Representative transmission electron microscopy images of Golgi and TGN

926 ultrastructure from Col-0, *nks1-1* and *nks1-2* hypocotyl epidermal cells of 3-day-old etiolated  
927 seedlings. (D) Representative images of PIN2-GFP localization in Col-0 and *nks1-2* root  
928 epidermal cells 3-day-old etiolated seedlings before and after BFA treatment, and following  
929 washout for 2h and 3h and quantification of plasma membrane:intracellular signal and  
930 number of BFA bodies as measurements of PIN2-GFP re-secretion from the TGN/BFA body.  
931 (E) Representative confocal images of Col-0 and *nks1-2* root epidermal cells of 3-day-old  
932 seedlings stained with FM-4-64 after BFA treatment and quantification of fluorescence  
933 intensities of FM-64 labelled bodies normalized to the fluorescence intensity of FM4-64  
934 present in the plasma membrane. Statistically significant differences were determined by  
935 unequal variance, two tailed Student's t test, where ns indicates non-significance. In violin  
936 plots, data distribution is outlined by the shape, plot box limits indicate 25<sup>th</sup> and  
937 75<sup>th</sup> percentiles, whiskers extend to 1.5 times the interquartile range, median is indicated by  
938 a horizontal line, mean by a red dot and individual data points are shown, and n (cells, no  
939 more than 3 cells imaged per seedling) is indicated in parentheses. Scale bars represent 10  
940  $\mu$ m in (A), (B), (D) and (E) and 200 nm in (C)

941

942 **Figure S5: *nks1* mutants are defective in cell wall pectins, but cellulose synthesis is not**  
943 **significantly affected in *nks1* mutants.**

944 (A) Representative images of toluidine blue-stained Col-0, *nks1-1* and *nks1-2* 6-day-old  
945 etiolated seedlings. (B) Measurement of cellulose content from Col-0, *nks1-1* and *nks1-2* 6-  
946 day-old etiolated seedlings. (C) Representative images and quantification of GFP-CESA3 in Col-  
947 0 and *nks1-2* 3-day-old etiolated hypocotyl epidermal cells. Data are represented as single  
948 frames from the time lapse, a sum projection of the data (from 10-minute time lapse with 10  
949 second intervals) and a kymograph from the yellow line indicated in the single frame. CESA  
950 speeds in the plasma membrane were quantified using the kymographs while CESA density  
951 at the plasma membrane was quantified from single frames. Statistically significant  
952 differences were determined by unequal variance, two tailed Student's t-test, where ns  
953 indicates non-significance. In violin plots, data distribution is outlined by the shape, plot box  
954 limits indicate 25<sup>th</sup> and 75<sup>th</sup> percentiles, whiskers extend to 1.5 times the interquartile range,  
955 median is indicated by a horizontal line, mean by a red dot and individual data points are  
956 shown, and n is indicated in parentheses. Scale bars represent 500  $\mu$ m in (A) and 10  $\mu$ m in (C).

957

958 **Figure S6: *nks1* mutants phenocopy pectin synthesis mutants, *qua1*, *qua2*.**

959 (A) Quantitative reverse-transcription polymerase chain reaction (qRT-PCR) of *FADLox*  
960 transcript levels normalized to *UBQ10* from Col-0, *nks1-1* and *nks1-2*; bars represent means  
961 of three biological replicates  $\pm$ SD. (B) Representative images of Col-0 and *nks1-2* seedlings  
962 grown on  $\frac{1}{2}$  MS growth medium supplemented with 0.5% sucrose (control) and 5% sucrose.  
963 (C) Representative z-projections (sum averages) of confocal stacks from propidium iodide-  
964 stained etiolated five-day old hypocotyl epidermal cell files from Col-0 and *nks1-2* grown on  
965  $\frac{1}{2}$  MS growth medium supplemented with 0.8% agar (control) and 2.5% agar, and  
966 quantification of hypocotyl lengths of six-day old etiolated seedlings from Col-0, *nks1-1* and  
967 *nks1-2* grown on  $\frac{1}{2}$  MS growth medium supplemented with 0.8% agar (control) and 2.5% agar.  
968 Letters in (A) specify statistically significant differences among samples as determined by one  
969 way ANOVA followed by Tukey's HSD test ( $p < 0.05$ ). Statistically significant differences were  
970 determined by unequal variance, two tailed Student's t-test, where ns indicates non-  
971 significance. In violin plots, data distribution is outlined by the shape, plot box limits indicate  
972 25<sup>th</sup> and 75<sup>th</sup> percentiles, whiskers extend to 1.5 times the interquartile range, median is

973 indicated by a horizontal line, mean by a red dot and individual data points are shown, and n  
974 is indicated in parentheses. Scale bars represent 500  $\mu\text{m}$  in (B) and 200  $\mu\text{m}$  in (C).

975

976 **Table S1: Genes co-expressed with NKS1 (At4g30996).** Data are from ATTED-II using  
977 At4g30996 as query gene.

978

979 **Table S2: GO enrichment analysis using the top 100 co-expressed genes from Table S1.**  
980 Output explanation may be found at: <http://geneontology.org/>

981

982 **Table S3: Monosaccharide composition of sequentially extracted and total cell wall material**  
983 **from wild type and *nks1-1* and *nks1-2* mutants.** Values are shown as mole percent (mol%) of  
984 evaluated sugars. The control values are mean (s.d.) of three biological replicates ( $n=3$ ). The  
985  $p$ -values between the control and average were calculated using a Student's t-test and  
986 significant differences ( $p<0.05$ ) are marked (\*).

987

988 **Table S4: Proteins identified in NKS1-GFP immunoprecipitation experiments.**

989

990 **Table S5: Additional Golgi and TGN measurements from TEM.** Golgi and TGN from  
991 morphometrics as quantified from transmission electron microscopy of high-pressure frozen,  
992 freeze-substituted hypocotyl epidermal cells of 3-day-old etiolated seedlings of Col-0 and  
993 *nks1-1* and *nks1-2*. Bold indicates statistically significant differences ( $p>0.05$ , t-test for  
994 measurements;  $p>0.01$ ,  $\chi^2$  test for proportions) between wild type and *nks1* mutants.

995

996 **Table S6: A list of all Arabidopsis seed lines employed in this study.** uNASC is The European  
997 *Arabidopsis* Stock Centre, Nottingham; GABI-KAT is from University of Bielefeld Germany.

998

999 **Table S7: A list of all synthetic oligonucleotides used in this study.** Oligonucleotides used in  
1000 PCR-based experiments were ordered from MWG-Biotech AG (Germany) or Sigma  
1001 (Australia).

1002

1003

1004 **REFERENCES:**

1005

1006 Amos RA, Pattathil S, Yang JY, Atmodjo MA, Urbanowicz BR, Moremen KW, Mohnen D. (2018)  
1007 A two-phase model for the non-processive biosynthesis of homogalacturonan  
1008 polysaccharides by the GAUT1:GAUT7 complex. *J Biol Chem.* 293: 19047-19063. doi:  
1009 10.1074/jbc.RA118.004463.

1010

1011 Anderson CT. (2016) We be jammin': an update on pectin biosynthesis, trafficking and  
1012 dynamics. *J Exp Bot.* 67: 495-502. doi: 10.1093/jxb/erv501.

1013

1014 Anderson CT, Kieber JJ. (2020) Dynamic Construction, Perception, and Remodeling of Plant  
1015 Cell Walls. *Annu Rev Plant Biol.* 71: 39-69. doi: 10.1146/annurev-arplant-081519-035846.

1016

1017 Atmodjo MA, Sakuragi Y, Zhu X, Burrell AJ, Mohanty SS, Atwood JA 3rd, Orlando R, Scheller  
1018 HV, Mohnen D. (2011) Galacturonosyltransferase (GAUT)1 and GAUT7 are the core of a plant  
1019 cell wall pectin biosynthetic homogalacturonan:galacturonosyltransferase complex. *Proc Natl*  
1020 *Acad Sci U S A.* 108: 20225-30.

1021

1022 Atmodjo MA, Hao Z, Mohnen D. (2013) Evolving views of pectin biosynthesis. *Annu Rev Plant*  
1023 *Biol.* 64: 747-79. doi: 10.1146/annurev-arplant-042811-105534.

1024

1025 Batoko H, Zheng HQ, Hawes C, Moore I. (2000) A rab1 GTPase is required for transport  
1026 between the endoplasmic reticulum and golgi apparatus and for normal golgi movement in  
1027 plants. *Plant Cell.* 12: 2201-18. doi: 10.1105/tpc.12.11.2201.

1028

1029 Bidhendi AJ, Altartouri B, Gosselin FP, Geitmann A. (2019) Mechanical Stress Initiates and  
1030 Sustains the Morphogenesis of Wavy Leaf Epidermal Cells. *Cell Rep.* 28: 1237-1250.e6. doi:  
1031 10.1016/j.celrep.2019.07.006.

1032

1033 Blum M, Chang HY, Chuguransky S, Grego T, Kandasaamy S, Mitchell A, Nuka G, Paysan-  
1034 Lafosse T, Qureshi M, Raj S, Richardson L, Salazar GA, Williams L, Bork P, Bridge A, Gough J,  
1035 Haft DH, Letunic I, Marchler-Bauer A, Mi H, Natale DA, Necci M, Orengo CA, Pandurangan AP,  
1036 Rivoire C, Sigrist CJA, Sillitoe I, Thanki N, Thomas PD, Tosatto SCE, Wu CH, Bateman A, Finn  
1037 RD. (2021) The InterPro protein families and domains database: 20 years on. *Nucleic Acids*  
1038 *Res.* 49(D1): D344-D354. doi: 10.1093/nar/gkaa977.

1039

1040 Bolte S, Cordelières FP. (2006) A guided tour into subcellular colocalization analysis in light  
1041 microscopy. *J Microsc.* 224(Pt 3): 213-32. doi: 10.1111/j.1365-2818.2006.01706.x.

1042

1043 Bolte S, Talbot C, Boutte Y, Catrice O, Read ND, Satiat-Jeunemaitre B. (2004) FM-dyes as  
1044 experimental probes for dissecting vesicle trafficking in living plant cells. *J Microsc.* 214(Pt 2):  
1045 159-73. doi: 10.1111/j.0022-2720.2004.01348.x.

1046

1047 Temple H, Saez-Aguayo S, Reyes FC, Orellana A. (2016) The inside and outside: topological  
1048 issues in plant cell wall biosynthesis and the roles of nucleotide sugar transporters.  
1049 *Glycobiology.* 26(9): 913-925. doi: 10.1093/glycob/cww054.

1050



- 1051 Boutté Y, Jonsson K, McFarlane HE, Johnson E, Gendre D, Swarup R, Friml J, Samuels L, Robert  
1052 S, Bhalerao RP. (2013) ECHIDNA-mediated post-Golgi trafficking of auxin carriers for  
1053 differential cell elongation. *Proc Natl Acad Sci U S A.* 110(40): 16259-64. doi:  
1054 10.1073/pnas.1309057110.
- 1055
- 1056 Campelo F, van Galen J, Turacchio G, Parashuraman S, Kozlov MM, García-Parajo MF,  
1057 Malhotra V. (2017) Sphingomyelin metabolism controls the shape and function of the Golgi  
1058 cisternae. *Elife.* 6: e24603. doi: 10.7554/eLife.24603.
- 1059
- 1060 Choi W, Baek D, Oh DH, Park J, Hong H, Kim WY, Bohnert HJ, Bressan RA, Park HC, Yun DJ.  
1061 (2011) NKS1, Na(+)- and K(+)-sensitive 1, regulates ion homeostasis in an SOS-independent  
1062 pathway in Arabidopsis. *Phytochemistry.* 72(4-5): 330-6. doi:  
1063 10.1016/j.phytochem.2010.12.005.
- 1064
- 1065 Clough SJ, Bent AF. (1998) Floral dip: a simplified method for *Agrobacterium*-mediated  
1066 transformation of *Arabidopsis thaliana*. *Plant J.* 16(6): 735-43. doi: 10.1046/j.1365-  
1067 313x.1998.00343.x.
- 1068
- 1069 Czechowski T, Stitt M, Altmann T, Udvardi MK, Scheible WR. (2005) Genome-wide  
1070 identification and testing of superior reference genes for transcript normalization in  
1071 Arabidopsis. *Plant Physiol.* 139(1): 5-17. doi: 10.1104/pp.105.063743.
- 1072
- 1073 Denoux C, Galletti R, Mammarella N, Gopalan S, Werck D, De Lorenzo G, Ferrari S, Ausubel  
1074 FM, Dewdney J. (2008) Activation of defense response pathways by OGs and Flg22 elicitors in  
1075 Arabidopsis seedlings. *Mol Plant.* 1(3): 423-45. doi: 10.1093/mp/ssn019.
- 1076
- 1077 Dettmer J, Hong-Hermesdorf A, Stierhof YD, Schumacher K. (2006) Vacuolar H<sup>+</sup>-ATPase  
1078 activity is required for endocytic and secretory trafficking in Arabidopsis. *Plant Cell.* 2006  
1079 18(3): 715-30. doi: 10.1105/tpc.105.037978.
- 1080
- 1081 El-Gebali S, Mistry J, Bateman A, Eddy SR, Luciani A, Potter SC, Qureshi M, Richardson LJ,  
1082 Salazar GA, Smart A, Sonnhammer ELL, Hirsh L, Paladin L, Piovesan D, Tosatto SCE, Finn RD.  
1083 (2019) The Pfam protein families database in 2019. *Nucleic Acids Res.* 47(D1): D427-D432.  
1084 doi: 10.1093/nar/gky995.
- 1085
- 1086 Engelsdorf T, Gigli-Bisceglia N, Veerabagu M, McKenna JF, Vaahtera L, Augstein F, Van der  
1087 Does D, Zipfel C, Hamann T. (2018) The plant cell wall integrity maintenance and immune  
1088 signaling systems cooperate to control stress responses in *Arabidopsis thaliana*. *Sci Signal.*  
1089 11(536):eaao3070. doi: 10.1126/scisignal.aao3070.
- 1090
- 1091 Gao P, Xin Z, Zheng ZL. (2008) The OSU1/QUA2/TSD2-encoded putative methyltransferase is  
1092 a critical modulator of carbon and nitrogen nutrient balance response in Arabidopsis. *PLoS*  
1093 *One.* 3(1): e1387. doi: 10.1371/journal.pone.0001387.
- 1094
- 1095 Gehl C, Waadt R, Kudla J, Mendel RR, Hänsch R. (2009) New GATEWAY vectors for high  
1096 throughput analyses of protein protein interactions by bimolecular fluorescence  
1097 complementation. *Mol Plant.* 2(5): 1051-8. doi: 10.1093/mp/ssp040.

1098  
1099 The Arabidopsis GNOM ARF GEF mediates endosomal recycling, auxin transport, and auxin-  
1100 dependent plant growth. (2003) Geldner N, Anders N, Wolters H, Keicher J, Kornberger W,  
1101 Muller P, Delbarre A, Ueda T, Nakano A, Jürgens G. *Cell*. 112(2): 219-30. doi: 10.1016/s0092-  
1102 8674(03)00003-5.  
1103  
1104 Geldner N, Déneraud-Tendon V, Hyman DL, Mayer U, Stierhof YD, Chory J. (2009) Rapid,  
1105 combinatorial analysis of membrane compartments in intact plants with a multicolor marker  
1106 set. *Plant J*. 59(1): 169-78. doi: 10.1111/j.1365-313X.2009.03851.x.  
1107  
1108 Gendre D, Oh J, Boutté Y, Best JG, Samuels L, Nilsson R, Uemura T, Marchant A, Bennett MJ,  
1109 Grebe M, Bhalerao RP. (2011) Conserved Arabidopsis ECHIDNA protein mediates trans-Golgi-  
1110 network trafficking and cell elongation. *Proc Natl Acad Sci U S A*. 108(19): 8048-53. doi:  
1111 10.1073/pnas.1018371108.  
1112  
1113 Gilles JF, Dos Santos M, Boudier T, Bolte S, Heck N. (2017) DiAna, an ImageJ tool for object-  
1114 based 3D co-localization and distance analysis. *Methods*. 115:55-64. doi:  
1115 10.1016/j.ymeth.2016.11.016.  
1116  
1117 Goodstein DM, Shu S, Howson R, Neupane R, Hayes RD, Fazo J, Mitros T, Dirks W, Hellsten U,  
1118 Putnam N, Rokhsar DS. (2012) Phytozome: a comparative platform for green plant genomics.  
1119 *Nucleic Acids Res*. 40(Database issue): D1178-86. doi: 10.1093/nar/gkr944.  
1120  
1121 Grebe M, Xu J, Möbius W, Ueda T, Nakano A, Geuze HJ, Rook MB, Scheres B. (2003)  
1122 Arabidopsis sterol endocytosis involves actin-mediated trafficking via ARA6-positive early  
1123 endosomes. *Curr Biol*. 13(16): 1378-87. doi: 10.1016/s0960-9822(03)00538-4.  
1124  
1125 Haas KT, Wightman R, Meyerowitz EM, Peaucelle A. (2020) Pectin homogalacturonan  
1126 nanofilament expansion drives morphogenesis in plant epidermal cells. *Science*. 367(6481):  
1127 1003-1007. doi: 10.1126/science.aaz5103.  
1128  
1129 Hamann T, Bennett M, Mansfield J, Somerville C. (2009) Identification of cell-wall stress as a  
1130 hexose-dependent and osmosensitive regulator of plant responses. *Plant J*. 57(6): 1015-26.  
1131 doi: 10.1111/j.1365-313X.2008.03744.x.  
1132  
1133 Harholt J, Jensen JK, Verhertbruggen Y, Søgaard C, Bernard S, Nafisi M, Poulsen CP, Geshi N,  
1134 Sakuragi Y, Driouich A, Knox JP, Scheller HV. (2012) ARAD proteins associated with pectic  
1135 Arabinan biosynthesis form complexes when transiently overexpressed in planta. *Planta*.  
1136 236(1): 115-28. doi: 10.1007/s00425-012-1592-3.  
1137  
1138 Hoffmann N, King S, Samuels AL, McFarlane HE. (2021) Subcellular coordination of plant cell  
1139 wall synthesis. *Dev Cell*. 56(7):933-948. doi: 10.1016/j.devcel.2021.03.004.  
1140  
1141 Hooper CM, Castleden IR, Tanz SK, Aryamanesh N, Millar AH. (2017) SUBA4: the interactive  
1142 data analysis centre for Arabidopsis subcellular protein locations. *Nucleic Acids Res*. 45(D1):  
1143 D1064-D1074. doi: 10.1093/nar/gkw1041.  
1144

- 1145 Jonsson K, Lathe RS, Kierzkowski D, Routier-Kierzkowska AL, Hamant O, Bhalerao RP. (2021)  
1146 Mechanochemical feedback mediates tissue bending required for seedling emergence. *Curr*  
1147 *Biol.* 31(6): 1154-1164.e3.  
1148
- 1149 Kleinboelting N, Huet G, Kloetgen A, Viehoveer P, Weisshaar B. (2012) GABI-Kat  
1150 SimpleSearch: new features of the Arabidopsis thaliana T-DNA mutant database. *Nucleic*  
1151 *Acids Res.* 40(Database issue):D1211-5. doi: 10.1093/nar/gkr1047.  
1152
- 1153 Kohorn BD, Kohorn SL, Saba NJ, Martinez VM. (2014) Requirement for pectin methyl esterase  
1154 and preference for fragmented over native pectins for wall-associated kinase-activated,  
1155 EDS1/PAD4-dependent stress response in Arabidopsis. *J Biol Chem.* 289(27): 18978-86. doi:  
1156 10.1074/jbc.M114.567545.  
1157
- 1158 Kremer JR, Mastrorade DN, McIntosh JR. (1996) Computer visualization of three-  
1159 dimensional image data using IMOD. *J Struct Biol.* 116(1): 71-6. doi: 10.1006/jsbi.1996.0013.  
1160
- 1161 Krogh A, Larsson B, von Heijne G, Sonnhammer EL. (2001) Predicting transmembrane protein  
1162 topology with a hidden Markov model: application to complete genomes. *J Mol Biol.*  
1163 305(3):567-80. doi: 10.1006/jmbi.2000.4315.  
1164
- 1165 Krupková E, Immerzeel P, Pauly M, Schmülling T. (2007) The TUMOROUS SHOOT  
1166 DEVELOPMENT2 gene of Arabidopsis encoding a putative methyltransferase is required for  
1167 cell adhesion and co-ordinated plant development. *Plant J.* 50(4): 735-50. doi:  
1168 10.1111/j.1365-313X.2007.03123.x.  
1169
- 1170 Lampugnani ER, Ho YY, Moller IE, Koh PL, Golz JF, Bacic A, Newbigin E. (2016) A  
1171 Glycosyltransferase from Nicotiana glauca Pollen Mediates Synthesis of a Linear (1,5)- $\alpha$ -L-  
1172 Arabinan When Expressed in Arabidopsis. *Plant Physiol.* 170(4): 1962-74. doi:  
1173 10.1104/pp.15.02005.  
1174
- 1175 Lewis MW, Leslie ME, Liljegren SJ. (2006) Plant separation: 50 ways to leave your mother. *Curr*  
1176 *Opin Plant Biol.* 9(1): 59-65. doi: 10.1016/j.pbi.2005.11.009.  
1177
- 1178 McFarlane HE, Young RE, Wasteneys GO, Samuels AL. (2008) Cortical microtubules mark the  
1179 mucilage secretion domain of the plasma membrane in Arabidopsis seed coat cells. *Planta.*  
1180 227(6): 1363-75. doi: 10.1007/s00425-008-0708-2.  
1181
- 1182 McFarlane HE, Gendre D, Western TL. (2014). Seed Coat Ruthenium Red Staining Assay. *Bio-*  
1183 *protocol.* 4(7): e1096. doi: 10.21769/BioProtoc.1096.  
1184
- 1185 McFarlane HE, Mutwil-Anderwald D, Verbančič J, Picard KL, Gookin TE, Froehlich A,  
1186 Chakravorty D, Trindade LM, Alonso JM, Assmann SM, Persson S. (2021) A G protein-coupled  
1187 receptor-like module regulates cellulose synthase secretion from the endomembrane system  
1188 in Arabidopsis. *Dev Cell.* S1534-5807(21)00306-3. doi: 10.1016/j.devcel.2021.03.031.  
1189
- 1190 Mouille G, Ralet MC, Cavelier C, Eland C, Effroy D, Hématy K, McCartney L, Truong HN, Gaudon  
1191 V, Thibault JF, Marchant A, Höfte H. (2007) Homogalacturonan synthesis in Arabidopsis

1192 thaliana requires a Golgi-localized protein with a putative methyltransferase domain. *Plant J.*  
1193 50(4): 605-14. doi: 10.1111/j.1365-313X.2007.03086.x.  
1194  
1195 Nebenführ A, Gallagher LA, Dunahay TG, Frohlick JA, Mazurkiewicz AM, Meehl JB, Staehelin  
1196 LA. (1999) Stop-and-go movements of plant Golgi stacks are mediated by the acto-myosin  
1197 system. *Plant Physiol.* 121(4): 1127-42. doi: 10.1104/pp.121.4.1127.  
1198  
1199 Neff MM, Turk E, Kalishman M. (2002) Web-based primer design for single nucleotide  
1200 polymorphism analysis. *Trends Genet.* 18(12): 613-5. doi: 10.1016/s0168-9525(02)02820-2.  
1201  
1202 Neumetzler L, Humphrey T, Lumba S, Snyder S, Yeats TH, Usadel B, Vasilevski A, Patel J, Rose  
1203 JK, Persson S, Bonetta D. (2012) The FRIABLE1 gene product affects cell adhesion in  
1204 *Arabidopsis*. *PLoS One.* 7(8):e42914. doi: 10.1371/journal.pone.0042914.  
1205  
1206 Nikolovski N, Rubtsov D, Segura MP, Miles GP, Stevens TJ, Dunkley TP, Munro S, Lilley KS,  
1207 Dupree P. (2012) Putative glycosyltransferases and other plant Golgi apparatus proteins are  
1208 revealed by LOPIT proteomics. *Plant Physiol.* 160(2): 1037-51. doi: 10.1104/pp.112.204263.  
1209  
1210 Obayashi T, Aoki Y, Tadaka S, Kagaya Y, Kinoshita K. (2018) ATTED-II in 2018: A Plant  
1211 Coexpression Database Based on Investigation of the Statistical Property of the Mutual Rank  
1212 Index. *Plant Cell Physiol.* 59(1): e3. doi: 10.1093/pcp/pcx191.  
1213  
1214 Ogawa M, Kay P, Wilson S, Swain SM. (2009) ARABIDOPSIS DEHISCENCE ZONE  
1215 POLYGALACTURONASE1 (ADPG1), ADPG2, and QUARTET2 are Polygalacturonases required  
1216 for cell separation during reproductive development in *Arabidopsis*. *Plant Cell.* 21(1): 216-33.  
1217 doi: 10.1105/tpc.108.063768.  
1218  
1219 Pandey SK, Lee HW, Kim MJ, Cho C, Oh E, Kim J. (2018) LBD18 uses a dual mode of a positive  
1220 feedback loop to regulate ARF expression and transcriptional activity in *Arabidopsis*. *Plant J.*  
1221 95(2):233-251. doi: 10.1111/tpj.13945.  
1222  
1223 Paredes AR, Somerville CR, Ehrhardt DW. (2006) Visualization of cellulose synthase  
1224 demonstrates functional association with microtubules. *Science.* 312(5779): 1491-5. doi:  
1225 10.1126/science.1126551.  
1226  
1227 Parsons HT, Christiansen K, Knierim B, Carroll A, Ito J, Batth TS, Smith-Moritz AM, Morrison S,  
1228 McInerney P, Hadi MZ, Auer M, Mukhopadhyay A, Petzold CJ, Scheller HV, Loqué D,  
1229 Heazlewood JL. (2012) Isolation and proteomic characterization of the *Arabidopsis* Golgi  
1230 defines functional and novel components involved in plant cell wall biosynthesis. *Plant*  
1231 *Physiol.* 159(1): 12-26. doi: 10.1104/pp.111.193151.  
1232  
1233 Parsons HT, Stevens TJ, McFarlane HE, Vidal-Melgosa S, Griss J, Lawrence N, Butler R, Sousa  
1234 MML, Salemi M, Willats WGT, Petzold CJ, Heazlewood JL, Lilley KS. (2019)  
1235 Separating Golgi Proteins from Cis to Trans Reveals Underlying Properties of Cisternal Localiz  
1236 ation. *Plant Cell.* 31(9): 2010-2034. doi: 10.1105/tpc.19.00081.  
1237

- 1238 Peaucelle A, Braybrook SA, Le Guillou L, Bron E, Kuhlemeier C, Höfte H. (2011) Pectin-induced  
1239 changes in cell wall mechanics underlie organ initiation in Arabidopsis. *Curr Biol.* 21(20): 1720-  
1240 6. doi: 10.1016/j.cub.2011.08.057.  
1241
- 1242 Peaucelle A, Wightman R, Höfte H. (2015) The Control of Growth Symmetry Breaking in the  
1243 Arabidopsis Hypocotyl. *Curr Biol.* 25(13): 1746-52. doi: 10.1016/j.cub.2015.05.022.  
1244
- 1245 Rautengarten C, Ebert B, Moreno I, Temple H, Herter T, Link B, Doñas-Cofré D, Moreno A,  
1246 Saéz-Aguayo S, Blanco F, Mortimer JC, Schultink A, Reiter WD, Dupree P, Pauly M, Heazlewood  
1247 JL, Scheller HV, Orellana A. (2014) The Golgi localized bifunctional UDP-rhamnose/UDP-  
1248 galactose transporter family of Arabidopsis. *Proc Natl Acad Sci U S A.* 111(31): 11563-8. doi:  
1249 10.1073/pnas.1406073111.  
1250
- 1251 Rautengarten C, Ebert B, Liu L, Stonebloom S, Smith-Moritz AM, Pauly M, Orellana A, Scheller  
1252 HV, Heazlewood JL. (2016) The Arabidopsis Golgi-localized GDP-L-fucose transporter is  
1253 required for plant development. *Nat Commun.* 7: 12119. doi: 10.1038/ncomms12119.  
1254
- 1255 Rautengarten C, Heazlewood JL, Ebert B. (2019) Profiling Cell Wall Monosaccharides and  
1256 Nucleotide-Sugars from Plants. *Bio-protocol.* 4(2): e20092.  
1257 <https://doi.org/10.1002/cppb.20092>  
1258
- 1259 Renna L, Hanton SL, Stefano G, Bortolotti L, Misra V, Brandizzi F. (2005) Identification and  
1260 characterization of AtCASP, a plant transmembrane Golgi matrix protein. *Plant Mol Biol.*  
1261 58(1): 109-22. doi: 10.1007/s11103-005-4618-4.  
1262
- 1263 Rhee SY, Osborne E, Poindexter PD, Somerville CR. (2003) Microspore separation in the  
1264 quartet 3 mutants of Arabidopsis is impaired by a defect in a developmentally regulated  
1265 polygalacturonase required for pollen mother cell wall degradation. *Plant Physiol.* 133(3):  
1266 1170-80. doi: 10.1104/pp.103.028266.  
1267
- 1268 Saint-Jore-Dupas C, Nebenführ A, Boulaflous A, Follet-Gueye ML, Plasson C, Hawes C, Driouich  
1269 A, Faye L, Gomord V. (2006) Plant N-glycan processing enzymes employ different targeting  
1270 mechanisms for their spatial arrangement along the secretory pathway. *Plant Cell.* 18(11):  
1271 3182-200. doi: 10.1105/tpc.105.036400.  
1272
- 1273 Samalova M, Fricker M, Moore I. (2006) Ratiometric fluorescence-imaging assays of plant  
1274 membrane traffic using polyproteins. *Traffic.* 7(12): 1701-23. doi: 10.1111/j.1600-  
1275 0854.2006.00502.x.  
1276
- 1277 Sampathkumar A, Gutierrez R, McFarlane HE, Bringmann M, Lindeboom J, Emons AM,  
1278 Samuels L, Ketelaar T, Ehrhardt DW, Persson S. (2013) Patterning and lifetime of plasma  
1279 membrane-localized cellulose synthase is dependent on actin organization in Arabidopsis  
1280 interphase cells. *Plant Physiol.* 162(2): 675-88. doi: 10.1104/pp.113.215277.  
1281
- 1282 Sánchez-Rodríguez C, Shi Y, Kesten C, Zhang D, Sancho-Andrés G, Ivakov A, Lampugnani ER,  
1283 Sklodowski K, Fujimoto M, Nakano A, Bacic A, Wallace IS, Ueda T, Van Damme D, Zhou Y,

- 1284 Persson S. (2018) The Cellulose Synthases Are Cargo of the TPLATE Adaptor Complex. *Mol*  
1285 *Plant*. 11(2):346-349. doi: 10.1016/j.molp.2017.11.012.
- 1286
- 1287 Scholl RL, May ST, Ware DH. (2000) Seed and molecular resources for Arabidopsis. *Plant*  
1288 *Physiol*. 124(4): 1477-80. doi: 10.1104/pp.124.4.1477.
- 1289
- 1290 Selvendran RR, O'Neill MA. (1987) Isolation and analysis of cell walls from plant material.  
1291 *Methods Biochem Anal*. 32: 25-153. doi: 10.1002/9780470110539.ch2.
- 1292
- 1293 Søggaard C, Stenbæk A, Bernard S, Hadi M, Driouch A, Scheller HV, Sakuragi Y. (2012) GO-  
1294 PROMTO illuminates protein membrane topologies of glycan biosynthetic enzymes in the  
1295 Golgi apparatus of living tissues. *PLoS One*. 7(2): e31324. doi: 10.1371/journal.pone.0031324.
- 1296
- 1297 Sterling JD, Atmodjo MA, Inwood SE, Kumar Kolli VS, Quigley HF, Hahn MG, Mohnen D. (2006)  
1298 Functional identification of an Arabidopsis pectin biosynthetic homogalacturonan  
1299 galacturonosyltransferase. *Proc Natl Acad Sci U S A*. 103(13): 5236-41. doi:  
1300 10.1073/pnas.0600120103.
- 1301
- 1302 Tanaka T, Tanaka H, Machida C, Watanabe M, Machida Y. (2004) A new method for rapid  
1303 visualization of defects in leaf cuticle reveals five intrinsic patterns of surface defects in  
1304 Arabidopsis. *Plant J*. 37(1): 139-46. doi: 10.1046/j.1365-313x.2003.01946.x.
- 1305
- 1306 Temple H, Saez-Aguayo S, Reyes FC, Orellana A. (2016) The inside and outside: topological  
1307 issues in plant cell wall biosynthesis and the roles of nucleotide sugar transporters.  
1308 *Glycobiology*. 26(9): 913-925. doi: 10.1093/glycob/cww054.
- 1309
- 1310 Thévenaz P, Ruttimann UE, Unser M. (1998) A pyramid approach to subpixel registration  
1311 based on intensity. *IEEE Trans Image Process*. 7(1): 27-41. doi: 10.1109/83.650848.
- 1312
- 1313 Tinevez JY, Perry N, Schindelin J, Hoopes GM, Reynolds GD, Laplantine E, Bednarek SY, Shorte  
1314 SL, Eliceiri KW. (2017) TrackMate: An open and extensible platform for single-particle tracking.  
1315 *Methods*. 115: 80-90. doi: 10.1016/j.ymeth.2016.09.016.
- 1316
- 1317 Uluisik S, Chapman NH, Smith R, Poole M, Adams G, Gillis RB, Besong TM, Sheldon J,  
1318 Stiegelmeier S, Perez L, Samsulrizal N, Wang D, Fisk ID, Yang N, Baxter C, Rickett D, Fray R,  
1319 Blanco-Ulate B, Powell AL, Harding SE, Craigon J, Rose JK, Fich EA, Sun L, Domozych DS, Fraser  
1320 PD, Tucker GA, Grierson D, Seymour GB. (2016)  
1321 Genetic improvement of tomato by targeted control of fruit softening. *Nat Biotechnol*.  
1322 34(9):950-2. doi: 10.1038/nbt.3602.
- 1323
- 1324 Updegraff DM. (1969) Semimicro determination of cellulose in biological materials. *Anal*  
1325 *Biochem*. 32(3): 420-4. doi: 10.1016/s0003-2697(69)80009-6.
- 1326
- 1327 Usadel B, Obayashi T, Mutwil M, Giorgi FM, Bassel GW, Tanimoto M, Chow A, Steinhauser D,  
1328 Persson S, Provart NJ. (2009) Co-expression tools for plant biology: opportunities for  
1329 hypothesis generation and caveats. *Plant Cell Environ*. 32(12): 1633-51. doi: 10.1111/j.1365-  
1330 3040.2009.02040.x.

- 1331  
1332 van Galen J, Campelo F, Martínez-Alonso E, Scarpa M, Martínez-Menárguez JÁ, Malhotra V.  
1333 (2014) Sphingomyelin homeostasis is required to form functional enzymatic domains at the  
1334 trans-Golgi network. *J Cell Biol.* 206(5): 609-18. doi: 10.1083/jcb.201405009.  
1335  
1336 Van Bel M, Diels T, Vancaester E, Kreft L, Botzki A, Van de Peer Y, Coppens F, Vandepoele K.  
1337 (2018) PLAZA 4.0: an integrative resource for functional, evolutionary and comparative plant  
1338 genomics. *Nucleic Acids Res.* 46(D1): D1190-D1196. doi: 10.1093/nar/gkx1002.  
1339  
1340 Verger S, Chabout S, Gineau E, Mouille G. (2016) Cell adhesion in plants is under the control  
1341 of putative O-fucosyltransferases. *Development.* 143(14): 2536-40. doi: 10.1242/dev.132308.  
1342  
1343 Verger S, Long Y, Boudaoud A, Hamant O. (2018) A tension-adhesion feedback loop in plant  
1344 epidermis. *Elife.* 7: e34460. doi: 10.7554/eLife.34460.  
1345  
1346 Viotti C, Bubeck J, Stierhof YD, Krebs M, Langhans M, van den Berg W, van Dongen W, Richter  
1347 S, Geldner N, Takano J, Jürgens G, de Vries SC, Robinson DG, Schumacher K. (2010) Endocytic  
1348 and secretory traffic in Arabidopsis merge in the trans-Golgi network/early endosome, an  
1349 independent and highly dynamic organelle. *Plant Cell.* 22(4): 1344-57. doi:  
1350 10.1105/tpc.109.072637.  
1351  
1352 Waese J, Fan J, Pasha A, Yu H, Fucile G, Shi R, Cumming M, Kelley LA, Sternberg MJ,  
1353 Krishnakumar V, Ferlanti E, Miller J, Town C, Stuerzlinger W, Provart NJ. (2017) ePlant:  
1354 Visualizing and Exploring Multiple Levels of Data for Hypothesis Generation in Plant Biology.  
1355 *Plant Cell.* 29(8): 1806-1821. doi: 10.1105/tpc.17.00073.  
1356  
1357 Wang P, Chen X, Goldbeck C, Chung E, Kang BH. (2017) A distinct class of vesicles derived from  
1358 the trans-Golgi mediates secretion of xylogalacturonan in the root border cell. *Plant J.* 92(4):  
1359 596-610. doi: 10.1111/tbj.13704.  
1360  
1361 Western TL, Skinner DJ, Haughn GW. (2000) Differentiation of mucilage secretory cells of  
1362 the Arabidopsis seed coat. *Plant Physiol.* 122(2): 345-56. doi: 10.1104/pp.122.2.345.  
1363  
1364 Willats WG, Orfila C, Limberg G, Buchholt HC, van Alebeek GJ, Voragen AG, Marcus SE,  
1365 Christensen TM, Mikkelsen JD, Murray BS, Knox JP. (2001) Modulation of the degree and  
1366 pattern of methyl-esterification of pectic homogalacturonan in plant cell walls. Implications  
1367 for pectin methyl esterase action, matrix properties, and cell adhesion. *J Biol Chem.* 276(22):  
1368 19404-13. doi: 10.1074/jbc.M011242200.  
1369  
1370 Xu J, Scheres B. (2005) Dissection of Arabidopsis ADP-RIBOSYLATION FACTOR 1 function in  
1371 epidermal cell polarity. *Plant Cell.* 17(2): 525-36. doi: 10.1105/tpc.104.028449.  
1372  
1373 Young RE, McFarlane HE, Hahn MG, Western TL, Haughn GW, Samuels AL. (2008) Analysis of  
1374 the Golgi apparatus in Arabidopsis seed coat cells during polarized secretion of pectin-rich  
1375 mucilage. *Plant Cell.* 20(6): 1623-38. doi: 10.1105/tpc.108.058842.  
1376

- 1377 Zabolina OA, Zang N, Weerts R. (2021) Polysaccharide Biosynthesis: Glycosyltransferases and  
1378 Their Complexes. *Front Plant Sci.* 12: 625307. doi: 10.3389/fpls.2021.625307.  
1379
- 1380 Zhang GF, Staehelin LA. (1992) Functional compartmentation of the Golgi apparatus of plant  
1381 cells: immunocytochemical analysis of high-pressure frozen- and freeze-substituted sycamore  
1382 maple suspension culture cells. *Plant Physiol.* 99(3): 1070-83. doi: 10.1104/pp.99.3.1070.  
1383
- 1384 Zhang Y, Nikolovski N, Sorieul M, Velloso T, McFarlane HE, Dupree R, Kesten C, Schneider R,  
1385 Driemeier C, Lathe R, Lampugnani E, Yu X, Ivakov A, Doblin MS, Mortimer JC, Brown SP,  
1386 Persson S, Dupree P . (2016) Golgi-localized STELLO proteins regulate the assembly and  
1387 trafficking of cellulose synthase complexes in Arabidopsis. *Nat Commun.* 7: 11656. doi:  
1388 10.1038/ncomms11656.  
1389



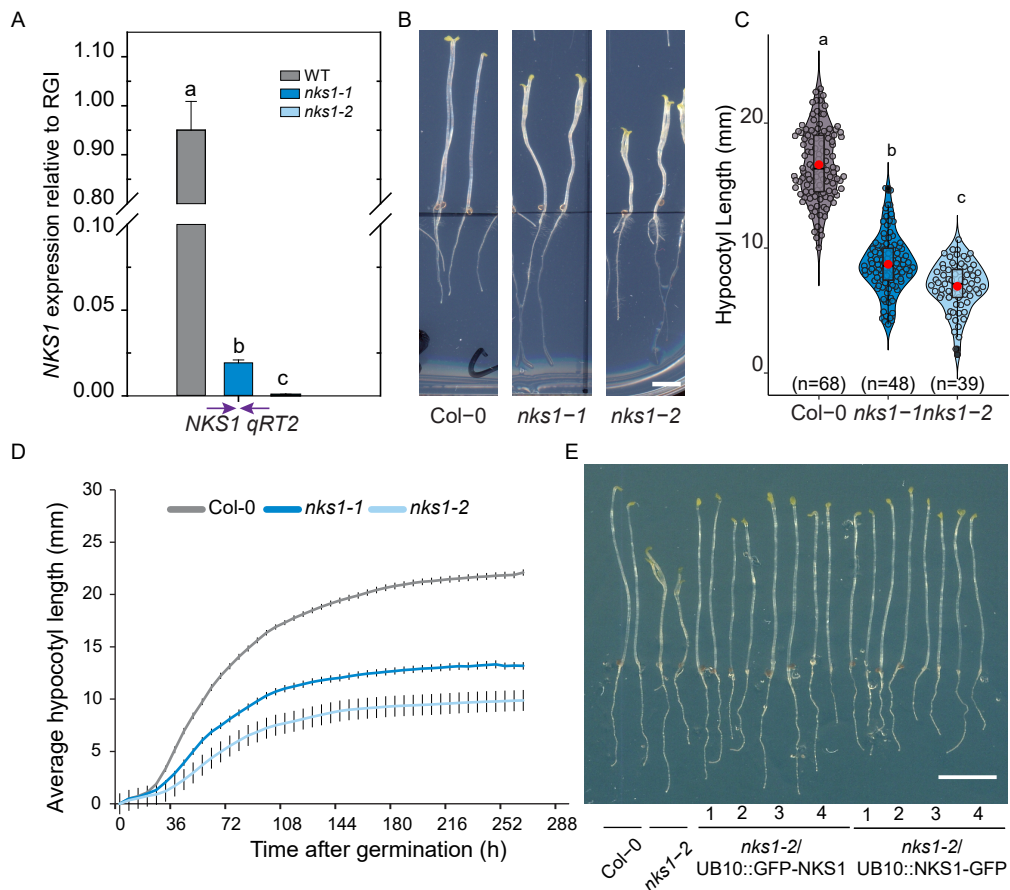

Figure1: *nks1* mutants are defective in cell elongation

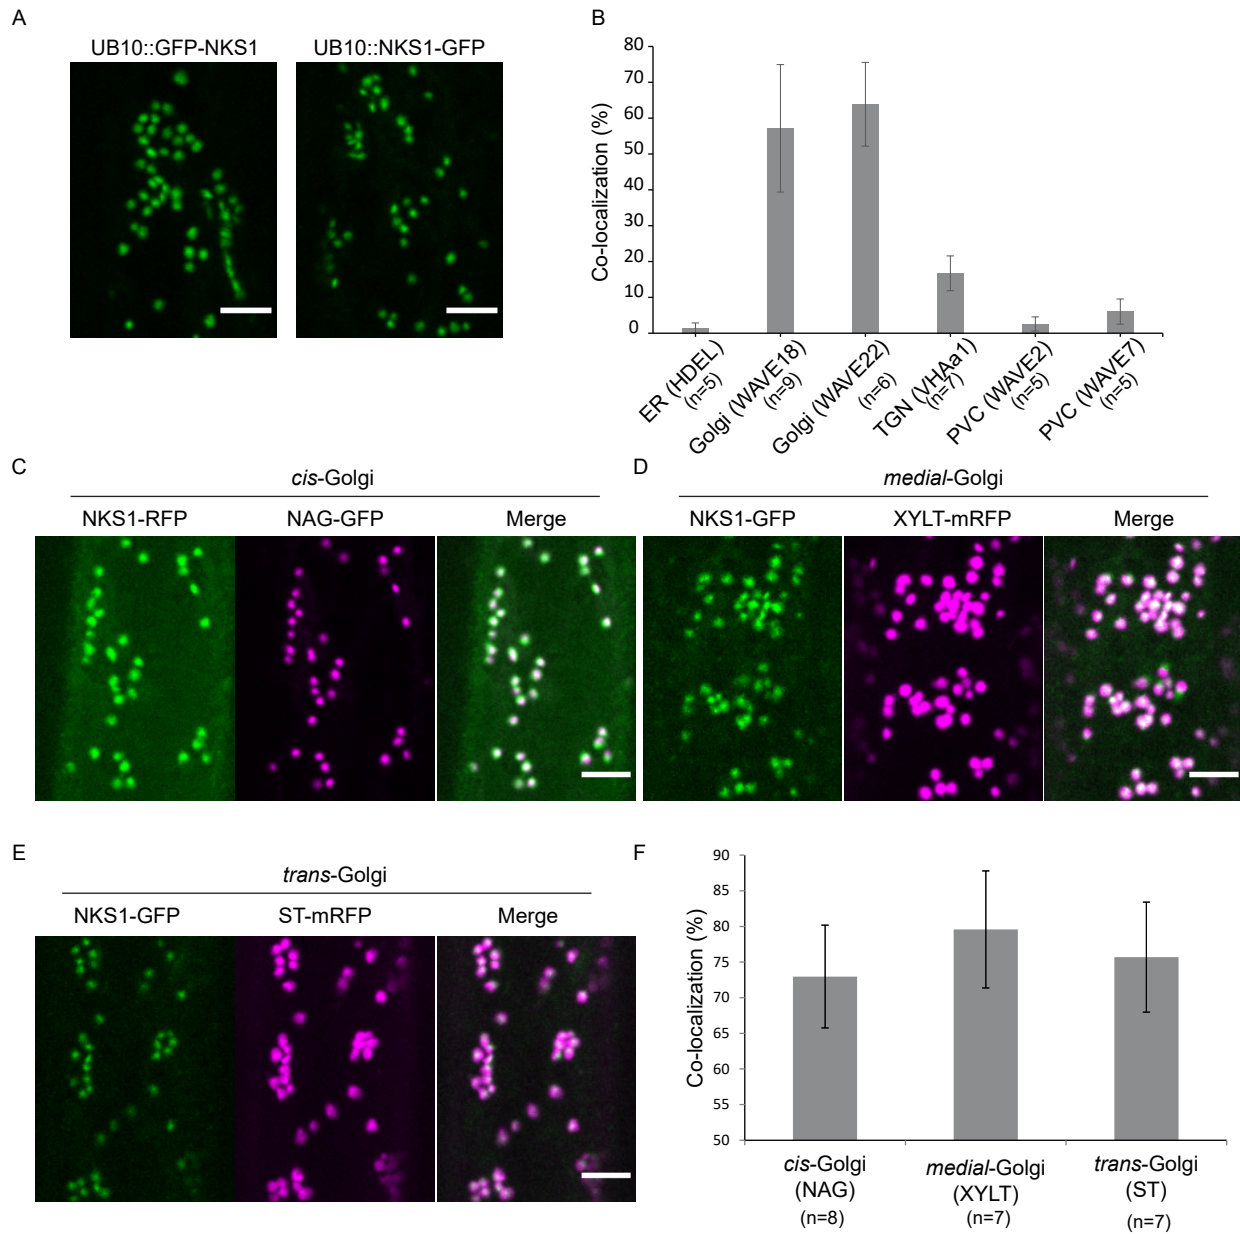

Figure2: Functional NKS1-GFP fusion is localized to medial-Golgi apparatus.

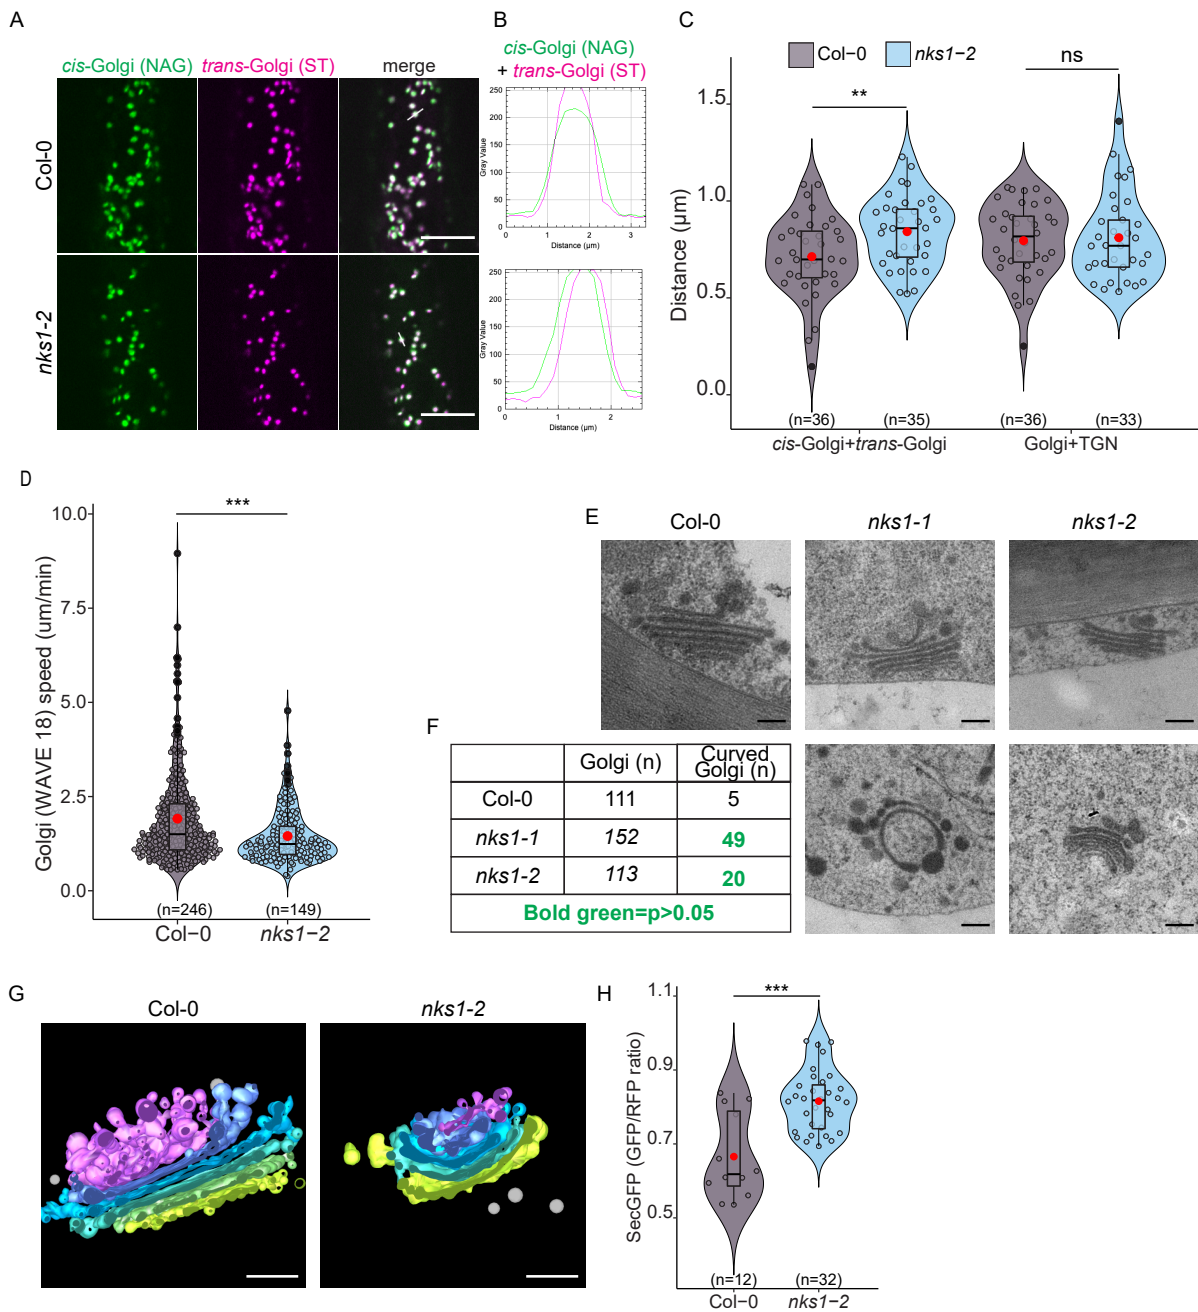

Figure 3: *nks1* mutants are defective in Golgi apparatus structure and function.

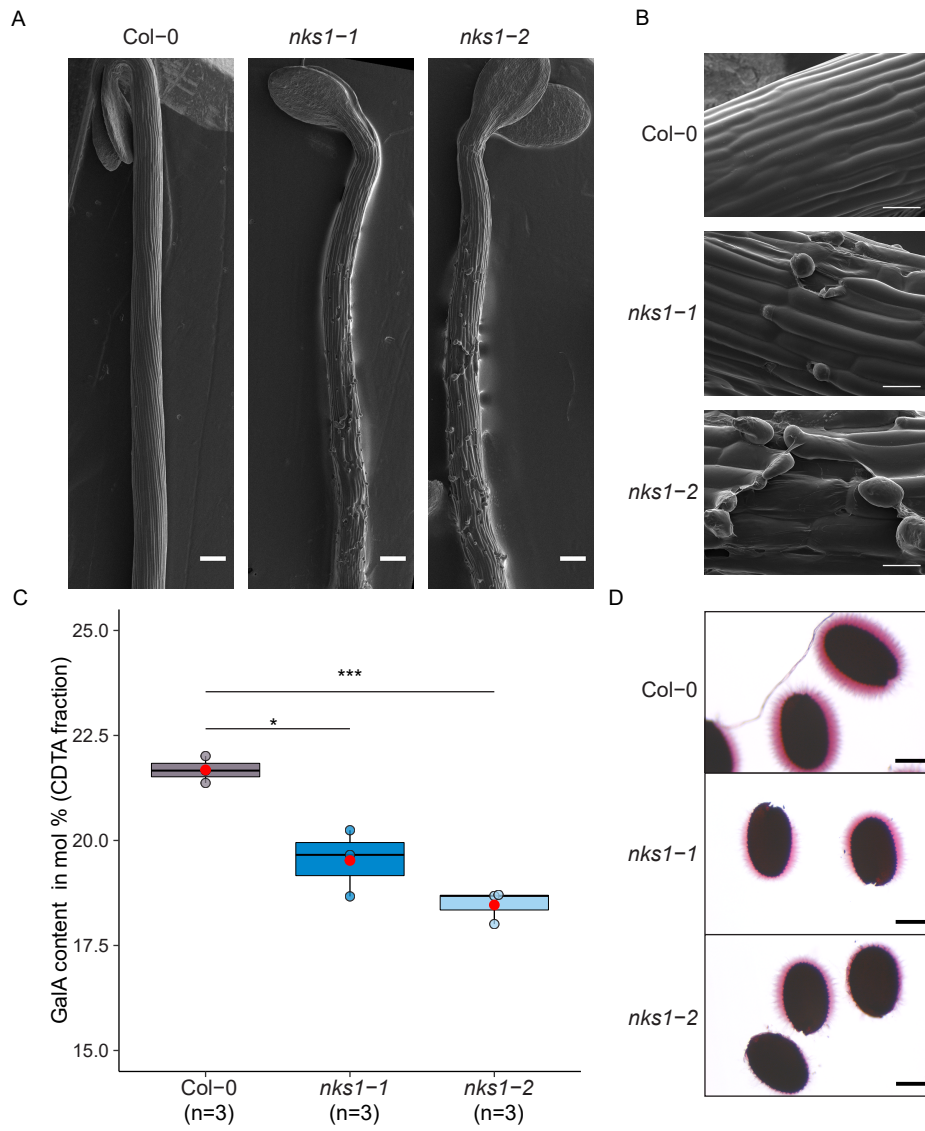

Figure 4: *nks1* mutants are defective in cell adhesion and cell wall pectins.

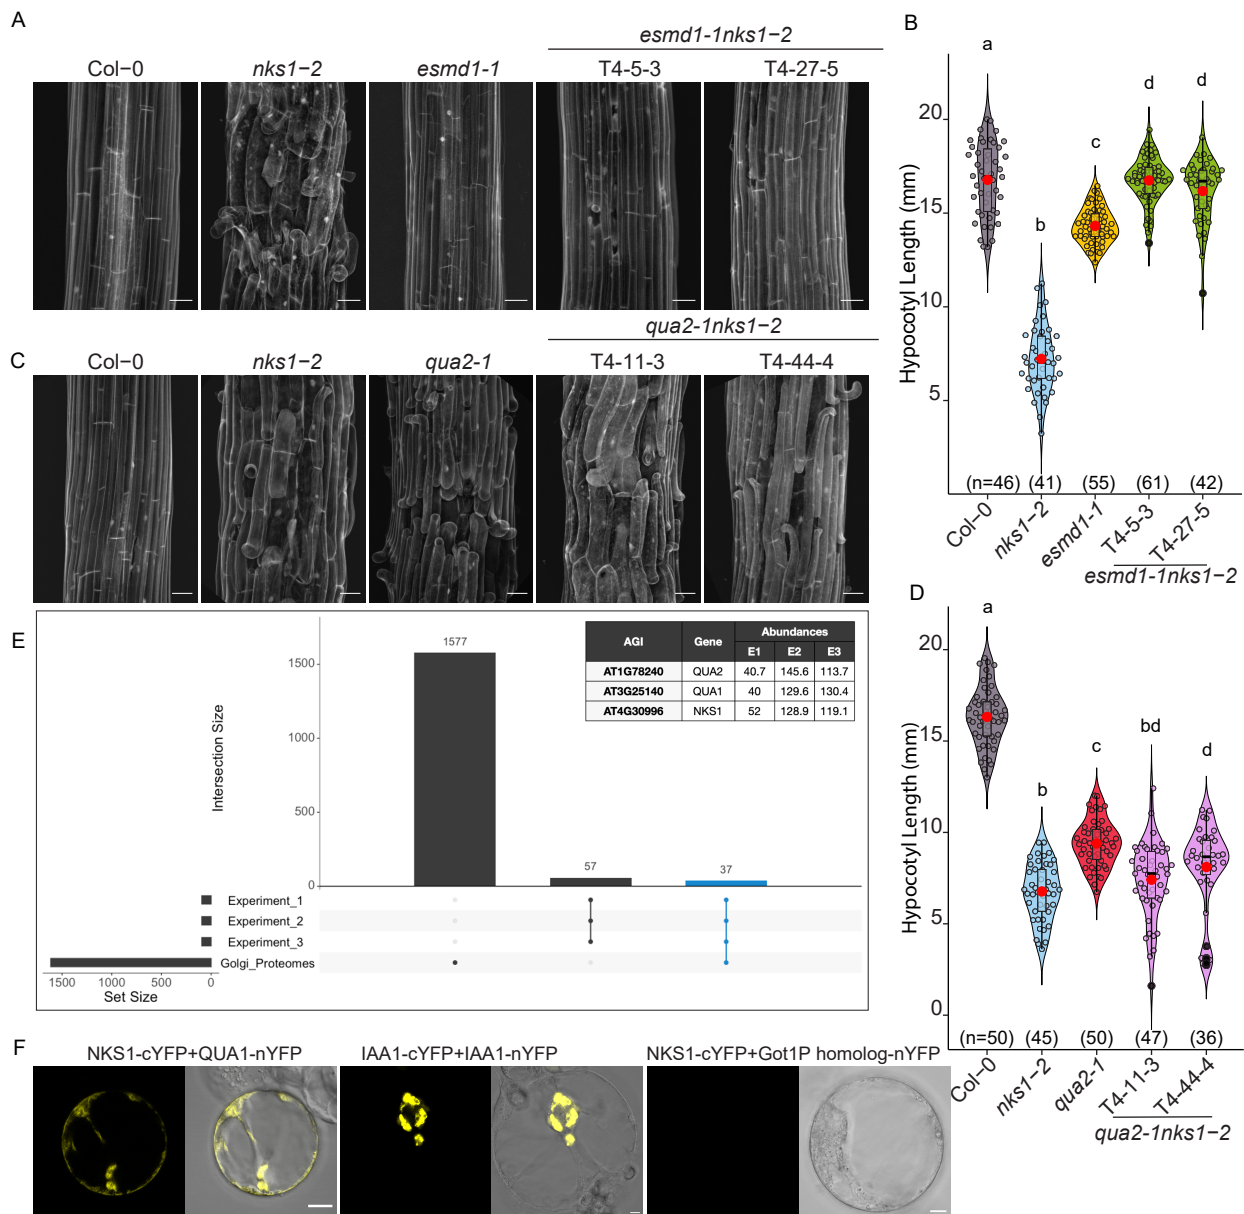

Figure 5: NKS1 interacts with QUA1 and QUA2.
